# Supplementary material
Source: publisher figshare collection journal article supplement (https://gsajournals.figshare.com/ndownloader/files/28348875)
Supplement: Supplementary file 1 [file 28348875]

## Sheet: PAT_BFMI
Pathway Name	Pathway Id	Source Name	in TRD	in Pathway	Pathway p-value	Pathway p-value (corrected)
Post-transcriptional silencing by small RNAs	17398	REACTOME	3	6	3.32979e-05	0.00822458
Small interfering RNA (siRNA) biogenesis	19179	REACTOME	3	8	9.16034e-05	0.011313
MicroRNA (miRNA) biogenesis	18164	REACTOME	3	10	0.000192863	0.0158791
Neurofascin interactions	19385	REACTOME	2	7	0.00291335	0.179899
Ribosomal scanning and start codon recognition	19448	REACTOME	2	54	0.138125	0.286695
Translation initiation complex formation	17714	REACTOME	2	54	0.138125	0.286695
Defective B3GAT3 causes JDSSDHD	17861	REACTOME	3	106	0.136156	0.28744
Defective B4GALT1 causes B4GALT1-CDG (CDG-2d)	19245	REACTOME	3	106	0.136156	0.28744
Defective B4GALT7 causes EDS, progeroid type	17791	REACTOME	3	106	0.136156	0.28744
Defective CHST14 causes EDS, musculocontractural type	19017	REACTOME	3	106	0.136156	0.28744
Defective CHST3 causes SEDCJD	19031	REACTOME	3	106	0.136156	0.28744
Defective CHST6 causes MCDC1	19716	REACTOME	3	106	0.136156	0.28744
Defective CHSY1 causes TPBS	17859	REACTOME	3	106	0.136156	0.28744
Defective EXT1 causes exostoses 1, TRPS2 and CHDS	19490	REACTOME	3	106	0.136156	0.28744
Defective EXT2 causes exostoses 2	19903	REACTOME	3	106	0.136156	0.28744
Defective PAPSS2 causes SEMD-PA	19463	REACTOME	3	106	0.136156	0.28744
Defective SLC26A2 causes chondrodysplasias	19918	REACTOME	3	106	0.136156	0.28744
Diseases associated with glycosaminoglycan metabolism	17949	REACTOME	3	106	0.136156	0.28744
Diseases of glycosylation	17808	REACTOME	3	106	0.136156	0.28744
Glycosaminoglycan metabolism	16666	REACTOME	3	106	0.136156	0.28744
MPS I - Hurler syndrome	17707	REACTOME	3	106	0.136156	0.28744
MPS II - Hunter syndrome	17928	REACTOME	3	106	0.136156	0.28744
MPS IIIA - Sanfilippo syndrome A	19358	REACTOME	3	106	0.136156	0.28744
MPS IIIB - Sanfilippo syndrome B	19355	REACTOME	3	106	0.136156	0.28744
MPS IIIC - Sanfilippo syndrome C	17652	REACTOME	3	106	0.136156	0.28744
MPS IIID - Sanfilippo syndrome D	17761	REACTOME	3	106	0.136156	0.28744
MPS IV - Morquio syndrome A	17376	REACTOME	3	106	0.136156	0.28744
MPS IV - Morquio syndrome B	17124	REACTOME	3	106	0.136156	0.28744
MPS IX - Natowicz syndrome	18442	REACTOME	3	106	0.136156	0.28744
MPS VI - Maroteaux-Lamy syndrome	19188	REACTOME	3	106	0.136156	0.28744
MPS VII - Sly syndrome	18978	REACTOME	3	106	0.136156	0.28744
Mucopolysaccharidoses	19617	REACTOME	3	106	0.136156	0.28744
Rho GTPase cycle	18718	REACTOME	3	106	0.136156	0.28744
Signaling by Rho GTPases	18142	REACTOME	3	106	0.136156	0.28744
Activation of the mRNA upon binding of the cap-binding complex and eIFs, and subsequent binding to 43S	17072	REACTOME	2	55	0.142261	0.292821
BMP2 signaling	16230	INOH	2	57	0.150613	0.307449
CDT1 association with the CDC6:ORC:origin complex	16983	REACTOME	2	59	0.15906	0.309353
Semaphorin interactions	19281	REACTOME	2	59	0.15906	0.309353
p53-Dependent G1 DNA Damage Response	17485	REACTOME	2	59	0.15906	0.309353
p53-Dependent G1/S DNA damage checkpoint	17516	REACTOME	2	59	0.15906	0.309353
Oocyte meiosis	8114	KEGG	3	112	0.153044	0.309851
SCF(Skp2)-mediated degradation of p27/p21	19632	REACTOME	2	58	0.154825	0.310909
Long-term depression	775	KEGG	2	60	0.163317	0.31515
Transmembrane transport of small molecules	18857	REACTOME	9	518	0.172623	0.32548
G1/S DNA Damage Checkpoints	18495	REACTOME	2	62	0.171891	0.326592
Regulation of Apoptosis	18195	REACTOME	2	62	0.171891	0.326592
Cytochrome P450 - arranged by substrate type	16648	REACTOME	2	64	0.180538	0.337825
Cyclin A:Cdk2-associated events at S phase entry	17275	REACTOME	2	66	0.189251	0.338731
Cyclin E associated events during G1/S transition	19417	REACTOME	2	66	0.189251	0.338731
Long-term potentiation	729	KEGG	2	66	0.189251	0.338731
Peptide hormone metabolism	18136	REACTOME	2	66	0.189251	0.338731
Glioma	740	KEGG	2	65	0.184887	0.340799
Transcriptional regulation of white adipocyte differentiation	16682	REACTOME	2	65	0.184887	0.340799
Assembly of the pre-replicative complex	19853	REACTOME	2	67	0.193629	0.344074
G alpha (12/13) signalling events	18452	REACTOME	2	46	0.106136	0.344943
Axon guidance	18680	REACTOME	6	268	0.104956	0.345656
Heparan sulfate/heparin (HS-GAG) metabolism	18385	REACTOME	2	45	0.102296	0.346126
Regulation of cholesterol biosynthesis by SREBP (SREBF)	17083	REACTOME	2	45	0.102296	0.346126
TGF-beta signaling	16256	INOH	3	94	0.104574	0.349052
Non-integrin membrane-ECM interactions	19127	REACTOME	2	43	0.0947386	0.34926
Apoptotic execution phase	19735	REACTOME	2	42	0.0910237	0.351295
Circadian Clock	14815	REACTOME	2	42	0.0910237	0.351295
Circadian Clock	16967	REACTOME	2	42	0.0910237	0.351295
GPVI-mediated activation cascade	18392	REACTOME	2	42	0.0910237	0.351295
Pyruvate metabolism and Citric Acid (TCA) cycle	18874	REACTOME	2	42	0.0910237	0.351295
Ribosome	756	KEGG	4	142	0.0925044	0.351517
Formation of the ternary complex, and subsequently, the 43S complex	19793	REACTOME	2	47	0.110015	0.352904
Gene Expression	19038	REACTOME	13	723	0.0946344	0.354162
Regulatory RNA pathways	19108	REACTOME	3	93	0.102089	0.355156
Signaling by GPCR	17023	REACTOME	11	616	0.123021	0.357484
Chondroitin sulfate/dermatan sulfate metabolism	17556	REACTOME	2	44	0.0984967	0.357775
Developmental Biology	19101	REACTOME	8	409	0.120497	0.358587
GPCR downstream signaling	16814	REACTOME	10	524	0.100173	0.358591
Apoptosis	16750	REACTOME	4	147	0.101784	0.359153
PPARA activates gene expression	19083	REACTOME	3	102	0.125284	0.359827
SRP-dependent cotranslational protein targeting to membrane	18716	REACTOME	3	101	0.122618	0.360555
Melanogenesis	694	KEGG	3	100	0.119973	0.361382
Orc1 removal from chromatin	18150	REACTOME	2	70	0.206839	0.362335
Switching of origins to a post-replicative state	17188	REACTOME	2	70	0.206839	0.362335
G1/S Transition	18725	REACTOME	3	103	0.127971	0.363321
Extracellular matrix organization	17713	REACTOME	5	216	0.119889	0.365587
Regulation of actin cytoskeleton	724	KEGG	5	216	0.119889	0.365587
Signaling by Insulin receptor	17037	REACTOME	3	104	0.130679	0.366793
Melanoma	713	KEGG	2	71	0.211265	0.367482
Class A/1 (Rhodopsin-like receptors)	17050	REACTOME	6	277	0.11786	0.3685
Cellular responses to stress	17198	REACTOME	5	214	0.116494	0.368898
G2/M Checkpoints	18178	REACTOME	2	40	0.0837299	0.369309
Iron uptake and transport	17954	REACTOME	2	40	0.0837299	0.369309
Lipid digestion, mobilization, and transport	18099	REACTOME	2	40	0.0837299	0.369309
Retinoid metabolism and transport	16979	REACTOME	2	40	0.0837299	0.369309
Regulation of lipid metabolism by Peroxisome proliferator-activated receptor alpha (PPARalpha)	17948	REACTOME	3	105	0.133407	0.370243
Removal of licensing factors from origins	18754	REACTOME	2	72	0.2157	0.372573
GPCR ligand binding	18571	REACTOME	8	379	0.0869922	0.376966
Mitotic G1-G1/S phases	18886	REACTOME	4	124	0.0627462	0.378007
Lysosome	4357	KEGG	4	123	0.0612675	0.378327
Organelle biogenesis and maintenance	16776	REACTOME	4	123	0.0612675	0.378327
Endogenous sterols	17985	REACTOME	2	21	0.0261037	0.379271
Metabolism of non-coding RNA	17479	REACTOME	2	21	0.0261037	0.379271
Sema4D in semaphorin signaling	18833	REACTOME	2	21	0.0261037	0.379271
snRNP Assembly	18868	REACTOME	2	21	0.0261037	0.379271
Cellular Senescence	18091	REACTOME	4	141	0.0906995	0.379708
Integrin signaling pathway	16139	INOH	3	81	0.0742622	0.382141
TGF-beta signaling pathway	633	KEGG	3	81	0.0742622	0.382141
Oxidative Stress Induced Senescence	16762	REACTOME	3	88	0.0900363	0.38343
HS-GAG biosynthesis	18384	REACTOME	2	26	0.0388587	0.383924
Synthesis of bile acids and bile salts	18071	REACTOME	2	26	0.0388587	0.383924
Transferrin endocytosis and recycling	17199	REACTOME	2	26	0.0388587	0.383924
Adaptive Immune System	19062	REACTOME	8	484	0.229071	0.384901
Pathways in cancer	4393	KEGG	8	322	0.0405274	0.38501
Wnt signaling pathway	16166	INOH	2	76	0.233521	0.387112
Diseases associated with visual transduction	19427	REACTOME	2	75	0.229056	0.387512
Regulation of DNA replication	18076	REACTOME	2	75	0.229056	0.387512
Visual phototransduction	19178	REACTOME	2	75	0.229056	0.387512
Translation	17506	REACTOME	3	138	0.232476	0.387983
Mitochondrial biogenesis	19465	REACTOME	2	39	0.0801543	0.388198
Activation of ATR in response to replication stress	19222	REACTOME	2	33	0.0598064	0.388741
EPHB-mediated forward signaling	18609	REACTOME	2	33	0.0598064	0.388741
Activation of gene expression by SREBF (SREBP)	17082	REACTOME	2	35	0.0663665	0.390298
Eukaryotic Translation Termination	17591	REACTOME	2	80	0.25143	0.390586
Peptide chain elongation	16999	REACTOME	2	80	0.25143	0.390586
Phase 1 - Functionalization of compounds	16816	REACTOME	2	80	0.25143	0.390586
Signal Transduction	19426	REACTOME	24	1490	0.0790678	0.390595
Synthesis of bile acids and bile salts via 7alpha-hydroxycholesterol	18266	REACTOME	2	22	0.0284913	0.390964
DNA Replication Pre-Initiation	19667	REACTOME	2	79	0.246947	0.390999
L1CAM interactions	19011	REACTOME	2	79	0.246947	0.390999
M/G1 Transition	18162	REACTOME	2	79	0.246947	0.390999
Mitochondrial translation elongation	18701	REACTOME	2	79	0.246947	0.390999
Mitochondrial translation termination	19475	REACTOME	2	79	0.246947	0.390999
Metabolism	17674	REACTOME	20	1414	0.253411	0.391203
Bile acid and bile salt metabolism	19596	REACTOME	2	36	0.0697327	0.391454
Binding and Uptake of Ligands by Scavenger Receptors	17757	REACTOME	2	36	0.0697327	0.391454
GPCR signaling	16219	INOH	6	243	0.0733155	0.393672
Lipoprotein metabolism	18821	REACTOME	2	24	0.0335162	0.394215
YAP1- and WWTR1 (TAZ)-stimulated gene expression	19158	REACTOME	2	24	0.0335162	0.394215
Orphan transporters	17390	REACTOME	3	85	0.0831135	0.394789
MHC class II antigen presentation	18215	REACTOME	3	80	0.0721192	0.395854
Spliceosome	8119	KEGG	4	134	0.0785558	0.395986
Mitochondrial translation initiation	18795	REACTOME	2	78	0.242467	0.396619
Metabolism of nucleotides	19782	REACTOME	3	73	0.057934	0.397492
Wnt signaling pathway	698	KEGG	3	141	0.242117	0.398686
Apoptotic cleavage of cellular proteins	17470	REACTOME	2	32	0.0566162	0.399549
Latent infection of Homo sapiens with Mycobacterium tuberculosis	17474	REACTOME	2	32	0.0566162	0.399549
Phagosomal maturation (early endosomal stage)	17472	REACTOME	2	32	0.0566162	0.399549
G0 and Early G1	17289	REACTOME	2	23	0.0309629	0.402518
Cell surface interactions at the vascular wall	17646	REACTOME	2	83	0.26489	0.403876
Eukaryotic Translation Elongation	18743	REACTOME	2	83	0.26489	0.403876
Mitochondrial translation	16660	REACTOME	2	84	0.269379	0.405711
Role of LAT2/NTAL/LAB on calcium mobilization	18625	REACTOME	2	84	0.269379	0.405711
Insulin receptor recycling	19277	REACTOME	2	25	0.0361489	0.405853
Nonsense Mediated Decay (NMD) independent of the Exon Junction Complex (EJC)	17898	REACTOME	2	85	0.273867	0.407501
Small cell lung cancer	747	KEGG	2	85	0.273867	0.407501
G alpha (i) signalling events	18914	REACTOME	6	214	0.0446038	0.408042
Fc gamma R-mediated phagocytosis	4349	KEGG	2	86	0.278354	0.409247
Hematopoietic cell lineage	682	KEGG	2	86	0.278354	0.409247
REV-ERBA represses gene expression	17230	REACTOME	2	19	0.02159	0.41021
RORA activates circadian gene expression	17233	REACTOME	2	19	0.02159	0.41021
Sema4D induced cell migration and growth-cone collapse	18251	REACTOME	2	19	0.02159	0.41021
Glycogen storage diseases	18944	REACTOME	4	228	0.296283	0.411134
Metabolism of carbohydrates	19819	REACTOME	4	228	0.296283	0.411134
Myoclonic epilepsy of Lafora	19721	REACTOME	4	228	0.296283	0.411134
GnRH signaling pathway	723	KEGG	2	89	0.291805	0.411862
Prostate cancer	773	KEGG	2	89	0.291805	0.411862
Metabolism of lipids and lipoproteins	17812	REACTOME	8	519	0.289144	0.412825
Gap junction	700	KEGG	2	87	0.28284	0.413382
Endocytosis	4385	KEGG	4	225	0.288132	0.413772
Formation of a pool of free 40S subunits	18890	REACTOME	2	91	0.300757	0.415011
ECM-receptor interaction	639	KEGG	2	88	0.287324	0.415024
Stimuli-sensing channels	16742	REACTOME	2	88	0.287324	0.415024
EPHA-mediated growth cone collapse	17396	REACTOME	2	30	0.0504255	0.41517
Transcriptional activation of mitochondrial biogenesis	18723	REACTOME	2	30	0.0504255	0.41517
RNA Polymerase II Transcription	19676	REACTOME	2	92	0.305227	0.416525
Synthesis of DNA	16910	REACTOME	2	92	0.305227	0.416525
S Phase	19854	REACTOME	4	117	0.0527936	0.420646
Fatty acid, triacylglycerol, and ketone body metabolism	16965	REACTOME	3	165	0.320964	0.43086
Phagosome	10382	KEGG	3	165	0.320964	0.43086
mRNA surveillance pathway	10362	KEGG	2	95	0.318603	0.43239
EPH-Ephrin signaling	18408	REACTOME	3	72	0.0560275	0.432462
RNA transport	10354	KEGG	3	166	0.324282	0.432961
Signaling by the B Cell Receptor (BCR)	16805	REACTOME	3	171	0.340873	0.440814
Antigen processing: Ubiquitination & Proteasome degradation	18074	REACTOME	3	170	0.337555	0.441144
DNA Replication	17107	REACTOME	2	99	0.336346	0.441901
Nonsense Mediated Decay (NMD) enhanced by the Exon Junction Complex (EJC)	17890	REACTOME	2	99	0.336346	0.441901
Nonsense-Mediated Decay (NMD)	17718	REACTOME	2	99	0.336346	0.441901
Cell Cycle Checkpoints	17750	REACTOME	4	115	0.0501217	0.442145
Degradation of the extracellular matrix	19757	REACTOME	2	100	0.340761	0.44299
L13a-mediated translational silencing of Ceruloplasmin expression	19353	REACTOME	2	101	0.345168	0.444045
Cell-Cell communication	19700	REACTOME	2	102	0.349566	0.445066
GTP hydrolysis and joining of the 60S ribosomal subunit	19753	REACTOME	2	102	0.349566	0.445066
Metabolism of proteins	17734	REACTOME	8	555	0.354651	0.449224
Metabolism of amino acids and derivatives	18120	REACTOME	3	183	0.380545	0.460758
Cap-dependent Translation Initiation	18051	REACTOME	2	108	0.375735	0.461724
Eukaryotic Translation Initiation	18327	REACTOME	2	108	0.375735	0.461724
Hedgehog 'off' state	17041	REACTOME	2	108	0.375735	0.461724
beta-catenin independent WNT signaling	17380	REACTOME	2	108	0.375735	0.461724
Factors involved in megakaryocyte development and platelet production	18141	REACTOME	2	109	0.380057	0.462434
Immune System	17702	REACTOME	12	884	0.378826	0.463218
Calcium signaling pathway	667	KEGG	3	181	0.373958	0.468871
Peptide ligand-binding receptors	18683	REACTOME	3	181	0.373958	0.468871
Neurotransmitter Receptor Binding And Downstream Transmission In The Postsynaptic Cell	17261	REACTOME	2	112	0.392948	0.471156
Signaling by SCF-KIT	17280	REACTOME	2	112	0.392948	0.471156
Cell Cycle, Mitotic	16819	REACTOME	6	423	0.403063	0.478638
Cell Cycle	17635	REACTOME	7	501	0.401437	0.479009
Generic Transcription Pathway	19372	REACTOME	2	120	0.426718	0.504303
Chylomicron-mediated lipid transport	18793	REACTOME	2	13	0.0103217	0.509893
Signaling by Hedgehog	19238	REACTOME	2	122	0.435011	0.511656
Cell cycle	717	KEGG	2	123	0.439134	0.514057
Neuroactive ligand-receptor interaction	720	KEGG	8	283	0.0208664	0.515399
Class I MHC mediated antigen processing & presentation	16844	REACTOME	3	203	0.445401	0.518934
JAK STAT pathway and regulation	16126	INOH	3	204	0.448581	0.520186
Toll-Like Receptors Cascades	18742	REACTOME	2	127	0.455462	0.525697
Focal adhesion	788	KEGG	3	207	0.45808	0.526259
Rora activates circadian gene expression	14814	REACTOME	2	18	0.0194689	0.534312
Scavenging by Class A Receptors	17911	REACTOME	2	18	0.0194689	0.534312
Axon guidance	612	KEGG	2	130	0.467531	0.534631
EPO signaling pathway	16152	INOH	2	132	0.47549	0.538743
IL-7 signaling	16107	INOH	2	132	0.47549	0.538743
Neuronal System	19094	REACTOME	3	219	0.495365	0.546228
Mus musculus biological processes	16801	REACTOME	3	218	0.492304	0.547744
Ion channel transport	18602	REACTOME	2	137	0.495073	0.548355
Oxidative phosphorylation	605	KEGG	2	136	0.491193	0.548981
Ubiquitin mediated proteolysis	632	KEGG	2	136	0.491193	0.548981
VEGF signaling pathway	16191	INOH	2	135	0.487295	0.549597
The citric acid (TCA) cycle and respiratory electron transport	17057	REACTOME	2	139	0.502778	0.551939
Signaling by ERBB4	17279	REACTOME	2	140	0.506603	0.553676
Downstream signaling events of B Cell Receptor (BCR)	19848	REACTOME	2	144	0.521711	0.567677
Biological oxidations	19257	REACTOME	2	146	0.52915	0.570742
Fc epsilon receptor (FCERI) signaling	18703	REACTOME	2	146	0.52915	0.570742
Hemostasis	16941	REACTOME	5	407	0.548864	0.589432
Cell adhesion molecules (CAMs)	635	KEGG	2	154	0.558125	0.59421
Jak-STAT signaling pathway	651	KEGG	2	154	0.558125	0.59421
Transmission across Chemical Synapses	19547	REACTOME	2	159	0.575589	0.610174
Synthesis and interconversion of nucleotide di- and triphosphates	16692	REACTOME	2	17	0.0174415	0.615435
MAPK signaling pathway	728	KEGG	3	253	0.593523	0.626497
Aminoacyl-tRNA biosynthesis	684	KEGG	3	44	0.0158191	0.651219
Cytokine-cytokine receptor interaction	604	KEGG	3	264	0.62257	0.654361
Disease	16877	REACTOME	10	879	0.626713	0.655924
Purine metabolism	771	KEGG	2	179	0.640426	0.664643
Innate Immune System	16733	REACTOME	5	450	0.639072	0.666037
Platelet activation, signaling and aggregation	17716	REACTOME	2	186	0.661226	0.683359
Post-translational protein modification	17765	REACTOME	2	190	0.672678	0.692298
Chemokine signaling pathway	4351	KEGG	2	195	0.686556	0.694997
Chromatin modifying enzymes	18029	REACTOME	2	195	0.686556	0.694997
Chromatin organization	16838	REACTOME	2	195	0.686556	0.694997
Cytokine Signaling in Immune system	17370	REACTOME	2	194	0.683819	0.700843
SLC-mediated transmembrane transport	17032	REACTOME	2	223	0.755633	0.761801
Signaling by Wnt	16953	REACTOME	2	252	0.813065	0.81637
M Phase	17726	REACTOME	2	273	0.846881	0.846881

## Sheet: PAT_BFMI_SNP
Pathway Name	Pathway Id	Source Name	in TRD	in Pathway	Pathway p-value	Pathway p-value (corrected)
S Phase	19854	REACTOME	2	117	0.00254909	0.0152946
Extracellular matrix organization	17713	REACTOME	2	216	0.00846198	0.0253859
Cell Cycle, Mitotic	16819	REACTOME	2	423	0.0305153	0.0610306
Cell Cycle	17635	REACTOME	2	501	0.0417985	0.0626978
Disease	16877	REACTOME	2	879	0.114388	0.137266
Metabolism	17674	REACTOME	2	1414	0.24961	0.24961

## Sheet: MAT_BFMI
Pathway Name	Pathway Id	Source Name	in TRD	in Pathway	Pathway p-value	Pathway p-value (corrected)
DNA methylation	19058	REACTOME	19	72	5.53866e-18	5.72328e-16
Meiotic Synapsis	14405	REACTOME	21	94	4.03028e-18	6.24693e-16
Meiotic synapsis	17515	REACTOME	21	94	4.03028e-18	6.24693e-16
Meiosis	19565	REACTOME	21	108	7.99005e-17	6.19229e-15
Meiotic Recombination	14380	REACTOME	19	83	1.06543e-16	6.60566e-15
NoRC negatively regulates rRNA expression	16829	REACTOME	19	85	1.72198e-16	8.89691e-15
NoRC negatively regulates rRNA expression	17691	REACTOME	19	86	2.17812e-16	9.64598e-15
Negative epigenetic regulation of rRNA expression	19072	REACTOME	19	93	1.0347e-15	4.00946e-14
Systemic lupus erythematosus	2813	KEGG	22	139	1.45469e-15	5.01061e-14
HATs acetylate histones	17355	REACTOME	21	127	2.69977e-15	8.3693e-14
Packaging Of Telomere Ends	18493	REACTOME	14	43	6.02068e-15	1.69674e-13
Epigenetic regulation of gene expression	18436	REACTOME	19	108	1.91242e-14	4.94042e-13
DNA Damage/Telomere Stress Induced Senescence	17409	REACTOME	15	64	1.4365e-13	3.42549e-12
Telomere Maintenance	17615	REACTOME	14	63	2.13526e-12	4.72807e-11
Mus musculus biological processes	16801	REACTOME	23	218	2.32776e-12	4.81071e-11
RNA Polymerase I Promoter Opening	17369	REACTOME	12	44	6.11619e-12	1.18501e-10
Chromatin modifying enzymes	18029	REACTOME	21	195	1.54315e-11	2.65765e-10
Chromatin organization	16838	REACTOME	21	195	1.54315e-11	2.65765e-10
Deposition of new CENPA-containing nucleosomes at the centromere	19079	REACTOME	12	49	2.48411e-11	3.66702e-10
Nucleosome assembly	19078	REACTOME	12	49	2.48411e-11	3.66702e-10
SIRT1 negatively regulates rRNA Expression	18671	REACTOME	12	49	2.48411e-11	3.66702e-10
Condensation of Prophase Chromosomes	17912	REACTOME	12	54	8.57413e-11	1.20817e-09
Chromosome Maintenance	16909	REACTOME	14	82	9.47357e-11	1.27687e-09
PRC2 methylates histones and DNA	17482	REACTOME	12	55	1.08052e-10	1.39568e-09
Meiotic recombination	19572	REACTOME	12	57	1.69095e-10	2.09678e-09
formation of the beta-catenin:TCF transactivating complex	18061	REACTOME	12	63	5.83559e-10	6.95782e-09
HDACs deacetylate histones	19593	REACTOME	12	67	1.23582e-09	1.32105e-08
RMTs methylate histone arginines	19382	REACTOME	12	67	1.23582e-09	1.32105e-08
RNA Polymerase I Chain Elongation	19634	REACTOME	12	67	1.23582e-09	1.32105e-08
Transcriptional regulation by small RNAs	18461	REACTOME	12	82	1.36628e-08	1.41182e-07
Senescence-Associated Secretory Phenotype (SASP)	18860	REACTOME	12	83	1.57365e-08	1.57365e-07
Amyloids	17227	REACTOME	12	84	1.80885e-08	1.64925e-07
RNA Polymerase I Promoter Clearance	19627	REACTOME	12	84	1.80885e-08	1.64925e-07
Cellular Senescence	18091	REACTOME	15	141	1.76096e-08	1.70593e-07
RNA Polymerase I Transcription	16736	REACTOME	12	85	2.07514e-08	1.83798e-07
Oxidative Stress Induced Senescence	16762	REACTOME	12	88	3.09804e-08	2.66775e-07
Mitotic Prophase	19383	REACTOME	13	108	3.7419e-08	3.1351e-07
Regulatory RNA pathways	19108	REACTOME	12	93	5.83426e-08	4.75953e-07
Cellular responses to stress	17198	REACTOME	17	214	1.49747e-07	1.1903e-06
Cell Cycle	17635	REACTOME	26	501	3.88331e-07	3.00957e-06
Signaling by WNT in cancer	17123	REACTOME	16	207	5.16879e-07	3.90811e-06
RNA Polymerase I, RNA Polymerase III, and Mitochondrial Transcription	16787	REACTOME	12	116	6.84495e-07	5.05223e-06
Signaling by Wnt	16953	REACTOME	17	252	1.51785e-06	1.09426e-05
Gene Expression	19038	REACTOME	31	723	1.68154e-06	1.18472e-05
RNF mutants show enhanced WNT signaling and proliferation	18167	REACTOME	14	187	4.03396e-06	2.60527e-05
TCF dependent signaling in response to WNT	18550	REACTOME	14	187	4.03396e-06	2.60527e-05
XAV939 inhibits tankyrase, stabilizing AXIN	19889	REACTOME	14	187	4.03396e-06	2.60527e-05
misspliced LRP5 mutants have enhanced beta-catenin-dependent signaling	18155	REACTOME	14	187	4.03396e-06	2.60527e-05
M Phase	17726	REACTOME	14	273	0.000263109	0.00166457
Signal Transduction	19426	REACTOME	43	1490	0.000308468	0.0019125
Glycosaminoglycan degradation	752	KEGG	4	21	0.000410407	0.00249463
HDMs demethylate histones	17112	REACTOME	5	42	0.000738103	0.00440023
Cell Cycle, Mitotic	16819	REACTOME	17	423	0.000997431	0.00583403
Retinol metabolism	646	KEGG	9	87	0.000905496	0.0100159
Metabolism of nitric oxide	19220	REACTOME	3	17	0.00289264	0.0160128
eNOS activation and regulation	16991	REACTOME	3	17	0.00289264	0.0160128
NOSTRIN mediated eNOS trafficking	17210	REACTOME	2	5	0.00287594	0.01651
Scavenging by Class A Receptors	17911	REACTOME	3	18	0.00342747	0.0186406
Disease	16877	REACTOME	25	879	0.00857892	0.0458528
Bacterial invasion of epithelial cells	10403	KEGG	5	76	0.0100289	0.0518162
eNOS activation	17172	REACTOME	2	9	0.00989248	0.0519774
Class B/2 (Secretin family receptors)	17048	REACTOME	4	57	0.0167575	0.0851613
EPHB-mediated forward signaling	18609	REACTOME	3	33	0.0189749	0.0933685
SNARE interactions in vesicular transport	677	KEGG	3	33	0.0189749	0.0933685
Chylomicron-mediated lipid transport	18793	REACTOME	2	13	0.0204848	0.0976966
Platelet Adhesion to exposed collagen	18062	REACTOME	2	13	0.0204848	0.0976966
Binding and Uptake of Ligands by Scavenger Receptors	17757	REACTOME	3	36	0.0239185	0.112345
Lipid digestion, mobilization, and transport	18099	REACTOME	3	40	0.0314897	0.143556
GPCR ligand binding	18571	REACTOME	12	379	0.031333	0.144974
EPH-Ephrin signaling	18408	REACTOME	4	72	0.0358359	0.156467
GPVI-mediated activation cascade	18392	REACTOME	3	42	0.035692	0.158065
Wnt signaling pathway	698	KEGG	6	141	0.0354873	0.159436
Rora activates circadian gene expression	14814	REACTOME	2	18	0.0379841	0.161302
Non-integrin membrane-ECM interactions	19127	REACTOME	3	43	0.0378962	0.163164
Wnt signaling pathway	16166	INOH	4	76	0.0424147	0.166438
REV-ERBA represses gene expression	17230	REACTOME	2	19	0.04198	0.166844
RORA activates circadian gene expression	17233	REACTOME	2	19	0.04198	0.166844
Sema4D induced cell migration and growth-cone collapse	18251	REACTOME	2	19	0.04198	0.166844
Diseases associated with visual transduction	19427	REACTOME	4	75	0.0407102	0.168269
Visual phototransduction	19178	REACTOME	4	75	0.0407102	0.168269
Endogenous sterols	17985	REACTOME	2	21	0.0504149	0.186055
Metabolism of non-coding RNA	17479	REACTOME	2	21	0.0504149	0.186055
Sema4D in semaphorin signaling	18833	REACTOME	2	21	0.0504149	0.186055
Syndecan interactions	16738	REACTOME	2	21	0.0504149	0.186055
snRNP Assembly	18868	REACTOME	2	21	0.0504149	0.186055
Pathways in cancer	4393	KEGG	10	322	0.0526267	0.191933
Cell surface interactions at the vascular wall	17646	REACTOME	4	83	0.0554605	0.195372
Adrenaline,noradrenaline inhibits insulin secretion	19883	REACTOME	2	22	0.0548415	0.195412
Synthesis of bile acids and bile salts via 7alpha-hydroxycholesterol	18266	REACTOME	2	22	0.0548415	0.195412
GPCR signaling	16219	INOH	8	243	0.0599962	0.206654
Orphan transporters	17390	REACTOME	4	85	0.0595436	0.207399
Lipoprotein metabolism	18821	REACTOME	2	24	0.0640829	0.215931
YAP1- and WWTR1 (TAZ)-stimulated gene expression	19158	REACTOME	2	24	0.0640829	0.215931
Basal cell carcinoma	663	KEGG	3	55	0.0694874	0.219807
VEGFR2 mediated vascular permeability	18650	REACTOME	2	25	0.0688863	0.220152
WNT ligand biogenesis and trafficking	17115	REACTOME	2	25	0.0688863	0.220152
WNT ligand secretion is abrogated by the PORCN inhibitor LGK974	18926	REACTOME	2	25	0.0688863	0.220152
Signaling by GPCR	17023	REACTOME	16	616	0.066624	0.22208
Focal adhesion	788	KEGG	7	207	0.0677929	0.223572
ABC-family proteins mediated transport	19283	REACTOME	2	26	0.0738042	0.224307
CD28 co-stimulation	18479	REACTOME	2	26	0.0738042	0.224307
HS-GAG biosynthesis	18384	REACTOME	2	26	0.0738042	0.224307
Synthesis of bile acids and bile salts	18071	REACTOME	2	26	0.0738042	0.224307
VEGFA-VEGFR2 Pathway	18662	REACTOME	4	92	0.0750541	0.225891
Spliceosome	8119	KEGG	5	134	0.0827385	0.244276
Semaphorin interactions	19281	REACTOME	3	59	0.0819944	0.244406
Glucagon-type ligand receptors	16786	REACTOME	2	29	0.0891917	0.260844
Melanogenesis	694	KEGG	4	100	0.095023	0.267792
Signaling by VEGF	17216	REACTOME	4	100	0.095023	0.267792
EPHA-mediated growth cone collapse	17396	REACTOME	2	30	0.0945154	0.271294
Transcriptional activation of mitochondrial biogenesis	18723	REACTOME	2	30	0.0945154	0.271294
Amine ligand-binding receptors	17058	REACTOME	2	31	0.0999282	0.271735
Glucagon-like Peptide-1 (GLP1) regulates insulin secretion	19611	REACTOME	2	31	0.0999282	0.271735
SRP-dependent cotranslational protein targeting to membrane	18716	REACTOME	4	101	0.0976803	0.272801
Ribosome	756	KEGG	5	142	0.0998383	0.276338
Fcgamma receptor (FCGR) dependent phagocytosis	18964	REACTOME	3	67	0.109628	0.295519
Transmembrane transport of small molecules	18857	REACTOME	13	518	0.113149	0.302381
Activation of gene expression by SREBF (SREBP)	17082	REACTOME	2	35	0.122381	0.318807
Voltage gated Potassium channels	19298	REACTOME	2	35	0.122381	0.318807
Chemokine signaling pathway	4351	KEGG	6	195	0.122241	0.323885
Bile acid and bile salt metabolism	19596	REACTOME	2	36	0.128173	0.331113
Formation of RNA Pol II elongation complex	17827	REACTOME	2	37	0.134028	0.340563
RNA Polymerase II Transcription Elongation	18567	REACTOME	2	37	0.134028	0.340563
Mitochondrial biogenesis	19465	REACTOME	2	39	0.145913	0.358992
Vasopressin regulates renal water homeostasis via Aquaporins	18291	REACTOME	2	39	0.145913	0.358992
mRNA Splicing - Minor Pathway	17309	REACTOME	2	39	0.145913	0.358992
S Phase	19854	REACTOME	4	117	0.144636	0.36453
Retinoid metabolism and transport	16979	REACTOME	2	40	0.151935	0.370865
Hemostasis	16941	REACTOME	10	407	0.167408	0.373357
Integrin signaling pathway	16139	INOH	3	81	0.165004	0.373367
TGF-beta signaling pathway	633	KEGG	3	81	0.165004	0.373367
G alpha (i) signalling events	18914	REACTOME	6	214	0.166507	0.374037
Organelle biogenesis and maintenance	16776	REACTOME	4	123	0.164178	0.377001
Potassium Channels	18295	REACTOME	3	79	0.156633	0.379345
Circadian Clock	14815	REACTOME	2	42	0.164122	0.379684
Circadian Clock	16967	REACTOME	2	42	0.164122	0.379684
Pyruvate metabolism and Citric Acid (TCA) cycle	18874	REACTOME	2	42	0.164122	0.379684
Eukaryotic Translation Termination	17591	REACTOME	3	80	0.160802	0.380523
MHC class II antigen presentation	18215	REACTOME	3	80	0.160802	0.380523
Peptide chain elongation	16999	REACTOME	3	80	0.160802	0.380523
Eukaryotic Translation Elongation	18743	REACTOME	3	83	0.173506	0.384192
Chondroitin sulfate/dermatan sulfate metabolism	17556	REACTOME	2	44	0.176475	0.387994
Heparan sulfate/heparin (HS-GAG) metabolism	18385	REACTOME	2	45	0.182706	0.393325
Regulation of cholesterol biosynthesis by SREBP (SREBF)	17083	REACTOME	2	45	0.182706	0.393325
GPCR downstream signaling	16814	REACTOME	12	524	0.196099	0.397325
Nonsense Mediated Decay (NMD) independent of the Exon Junction Complex (EJC)	17898	REACTOME	3	85	0.18213	0.397607
ECM-receptor interaction	639	KEGG	3	88	0.195275	0.398259
Aquaporin-mediated transport	17852	REACTOME	2	46	0.188969	0.398506
G alpha (12/13) signalling events	18452	REACTOME	2	46	0.188969	0.398506
Fc gamma R-mediated phagocytosis	4349	KEGG	3	86	0.186485	0.398692
Formation of the ternary complex, and subsequently, the 43S complex	19793	REACTOME	2	47	0.195261	0.400867
Malaria	10373	KEGG	2	47	0.195261	0.400867
Regulation of actin dynamics for phagocytic cup formation	16740	REACTOME	2	47	0.195261	0.400867
ECM proteoglycans	19126	REACTOME	2	48	0.20158	0.405778
Peptide ligand-binding receptors	18683	REACTOME	5	181	0.20455	0.406477
Formation of a pool of free 40S subunits	18890	REACTOME	3	91	0.208648	0.406798
Costimulation by the CD28 family	18551	REACTOME	2	49	0.207923	0.407949
Hedgehog signaling pathway	730	KEGG	2	49	0.207923	0.407949
Endocytosis	4385	KEGG	6	225	0.19486	0.408152
Class A/1 (Rhodopsin-like receptors)	17050	REACTOME	7	277	0.20415	0.4083
Translation	17506	REACTOME	4	138	0.216706	0.419867
Regulation of ornithine decarboxylase (ODC)	18779	REACTOME	2	51	0.220668	0.424888
Defective B3GAT3 causes JDSSDHD	17861	REACTOME	3	106	0.277976	0.426596
Defective B4GALT1 causes B4GALT1-CDG (CDG-2d)	19245	REACTOME	3	106	0.277976	0.426596
Defective B4GALT7 causes EDS, progeroid type	17791	REACTOME	3	106	0.277976	0.426596
Defective CHST14 causes EDS, musculocontractural type	19017	REACTOME	3	106	0.277976	0.426596
Defective CHST3 causes SEDCJD	19031	REACTOME	3	106	0.277976	0.426596
Defective CHST6 causes MCDC1	19716	REACTOME	3	106	0.277976	0.426596
Defective CHSY1 causes TPBS	17859	REACTOME	3	106	0.277976	0.426596
Defective EXT1 causes exostoses 1, TRPS2 and CHDS	19490	REACTOME	3	106	0.277976	0.426596
Defective EXT2 causes exostoses 2	19903	REACTOME	3	106	0.277976	0.426596
Defective PAPSS2 causes SEMD-PA	19463	REACTOME	3	106	0.277976	0.426596
Defective SLC26A2 causes chondrodysplasias	19918	REACTOME	3	106	0.277976	0.426596
Diseases associated with glycosaminoglycan metabolism	17949	REACTOME	3	106	0.277976	0.426596
Diseases of glycosylation	17808	REACTOME	3	106	0.277976	0.426596
Glycosaminoglycan metabolism	16666	REACTOME	3	106	0.277976	0.426596
MPS I - Hurler syndrome	17707	REACTOME	3	106	0.277976	0.426596
MPS II - Hunter syndrome	17928	REACTOME	3	106	0.277976	0.426596
MPS IIIA - Sanfilippo syndrome A	19358	REACTOME	3	106	0.277976	0.426596
MPS IIIB - Sanfilippo syndrome B	19355	REACTOME	3	106	0.277976	0.426596
MPS IIIC - Sanfilippo syndrome C	17652	REACTOME	3	106	0.277976	0.426596
MPS IIID - Sanfilippo syndrome D	17761	REACTOME	3	106	0.277976	0.426596
MPS IV - Morquio syndrome A	17376	REACTOME	3	106	0.277976	0.426596
MPS IV - Morquio syndrome B	17124	REACTOME	3	106	0.277976	0.426596
MPS IX - Natowicz syndrome	18442	REACTOME	3	106	0.277976	0.426596
MPS VI - Maroteaux-Lamy syndrome	19188	REACTOME	3	106	0.277976	0.426596
MPS VII - Sly syndrome	18978	REACTOME	3	106	0.277976	0.426596
Mucopolysaccharidoses	19617	REACTOME	3	106	0.277976	0.426596
Cap-dependent Translation Initiation	18051	REACTOME	3	108	0.287424	0.436771
Eukaryotic Translation Initiation	18327	REACTOME	3	108	0.287424	0.436771
Factors involved in megakaryocyte development and platelet production	18141	REACTOME	3	109	0.292158	0.439655
G1/S DNA Damage Checkpoints	18495	REACTOME	2	62	0.29141	0.440669
Regulation of insulin secretion	17869	REACTOME	2	63	0.297837	0.446036
RNA Polymerase II Pre-transcription Events	18735	REACTOME	2	53	0.233476	0.446775
Glutathione metabolism	628	KEGG	2	54	0.239898	0.450717
Ribosomal scanning and start codon recognition	19448	REACTOME	2	54	0.239898	0.450717
Translation initiation complex formation	17714	REACTOME	2	54	0.239898	0.450717
Cytochrome P450 - arranged by substrate type	16648	REACTOME	2	64	0.304255	0.453456
Oocyte meiosis	8114	KEGG	3	112	0.306391	0.454455
Activation of the mRNA upon binding of the cap-binding complex and eIFs, and subsequent binding to 43S	17072	REACTOME	2	55	0.246328	0.454535
Nonsense Mediated Decay (NMD) enhanced by the Exon Junction Complex (EJC)	17890	REACTOME	3	99	0.24521	0.455181
Nonsense-Mediated Decay (NMD)	17718	REACTOME	3	99	0.24521	0.455181
Glioma	740	KEGG	2	65	0.310662	0.456423
Transcriptional regulation of white adipocyte differentiation	16682	REACTOME	2	65	0.310662	0.456423
Renal cell carcinoma	620	KEGG	2	66	0.317058	0.463623
Cell Cycle Checkpoints	17750	REACTOME	3	115	0.320653	0.464497
Axon guidance	18680	REACTOME	6	268	0.319308	0.46472
Assembly of the pre-replicative complex	19853	REACTOME	2	67	0.323441	0.466356
L13a-mediated translational silencing of Ceruloplasmin expression	19353	REACTOME	3	101	0.254514	0.466859
BMP2 signaling	16230	INOH	2	57	0.259207	0.467175
GTP hydrolysis and joining of the 60S ribosomal subunit	19753	REACTOME	3	102	0.259184	0.469867
PPARA activates gene expression	19083	REACTOME	3	102	0.259184	0.469867
Olfactory Signaling Pathway	18039	REACTOME	2	58	0.265651	0.476021
Regulation of lipid metabolism by Peroxisome proliferator-activated receptor alpha (PPARalpha)	17948	REACTOME	3	105	0.273264	0.481317
p53-Dependent G1 DNA Damage Response	17485	REACTOME	2	59	0.272095	0.481996
p53-Dependent G1/S DNA damage checkpoint	17516	REACTOME	2	59	0.272095	0.481996
Orc1 removal from chromatin	18150	REACTOME	2	70	0.342494	0.489277
Switching of origins to a post-replicative state	17188	REACTOME	2	70	0.342494	0.489277
Generic Transcription Pathway	19372	REACTOME	3	120	0.344433	0.48979
Melanoma	713	KEGG	2	71	0.348809	0.493747
Bile secretion	10387	KEGG	2	72	0.355104	0.498109
Removal of licensing factors from origins	18754	REACTOME	2	72	0.355104	0.498109
Lysosome	4357	KEGG	3	123	0.358675	0.500853
Neuroactive ligand-receptor interaction	720	KEGG	6	283	0.365659	0.508315
Gastric acid secretion	10371	KEGG	2	74	0.367629	0.508772
Regulation of DNA replication	18076	REACTOME	2	75	0.373856	0.515091
Adherens junction	741	KEGG	2	76	0.380059	0.521321
DNA Replication Pre-Initiation	19667	REACTOME	2	79	0.398512	0.534799
M/G1 Transition	18162	REACTOME	2	79	0.398512	0.534799
Mitochondrial translation elongation	18701	REACTOME	2	79	0.398512	0.534799
Mitochondrial translation termination	19475	REACTOME	2	79	0.398512	0.534799
Mitochondrial translation initiation	18795	REACTOME	2	78	0.392388	0.53586
Platelet activation, signaling and aggregation	17716	REACTOME	4	186	0.402679	0.538062
Phase 1 - Functionalization of compounds	16816	REACTOME	2	80	0.404607	0.538318
Developmental Biology	19101	REACTOME	8	409	0.413355	0.547608
Oxidative phosphorylation	605	KEGG	3	136	0.41971	0.55366
Huntington's disease	4374	KEGG	4	193	0.43003	0.560123
Mitochondrial translation	16660	REACTOME	2	84	0.428687	0.56073
Role of LAT2/NTAL/LAB on calcium mobilization	18625	REACTOME	2	84	0.428687	0.56073
Small cell lung cancer	747	KEGG	2	85	0.434628	0.561394
The citric acid (TCA) cycle and respiratory electron transport	17057	REACTOME	3	139	0.433552	0.562347
Transport of glucose and other sugars, bile salts and organic acids, metal ions and amine compounds	16992	REACTOME	2	86	0.440536	0.566665
Retinol metabolism	646	KEGG	2	87	0.446411	0.571848
Stimuli-sensing channels	16742	REACTOME	2	88	0.452251	0.576946
Arachidonic acid metabolism	648	KEGG	2	89	0.458057	0.577226
Integration of energy metabolism	17060	REACTOME	2	89	0.458057	0.577226
Prostate cancer	773	KEGG	2	89	0.458057	0.577226
Parkinson's disease	2792	KEGG	3	145	0.460864	0.578412
RNA Polymerase II Transcription	19676	REACTOME	2	92	0.475259	0.591688
Synthesis of DNA	16910	REACTOME	2	92	0.475259	0.591688
TGF-beta signaling	16256	INOH	2	94	0.486544	0.603315
Extracellular matrix organization	17713	REACTOME	4	216	0.517079	0.633575
Regulation of actin cytoskeleton	724	KEGG	4	216	0.517079	0.633575
DNA Replication	17107	REACTOME	2	99	0.514092	0.634934
mRNA Splicing	16998	REACTOME	2	101	0.524837	0.638037
mRNA Splicing - Major Pathway	19218	REACTOME	2	101	0.524837	0.638037
Neuronal System	19094	REACTOME	4	219	0.528002	0.639377
Cell-Cell communication	19700	REACTOME	2	102	0.53015	0.639481
G1/S Transition	18725	REACTOME	2	103	0.535423	0.643338
RNA transport	10354	KEGG	3	166	0.551501	0.645152
Rho GTPase cycle	18718	REACTOME	2	106	0.550999	0.647007
Signaling by Rho GTPases	18142	REACTOME	2	106	0.550999	0.647007
Signaling by Insulin receptor	17037	REACTOME	2	104	0.540656	0.647117
Fatty acid, triacylglycerol, and ketone body metabolism	16965	REACTOME	3	165	0.547386	0.64767
Phagosome	10382	KEGG	3	165	0.547386	0.64767
Processing of Capped Intron-Containing Pre-mRNA	19662	REACTOME	2	105	0.545848	0.650818
Hedgehog 'off' state	17041	REACTOME	2	108	0.561179	0.651556
beta-catenin independent WNT signaling	17380	REACTOME	2	108	0.561179	0.651556
Antigen processing: Ubiquitination & Proteasome degradation	18074	REACTOME	3	170	0.567741	0.656715
Signaling by the B Cell Receptor (BCR)	16805	REACTOME	3	171	0.571745	0.658888
Neurotransmitter Receptor Binding And Downstream Transmission In The Postsynaptic Cell	17261	REACTOME	2	112	0.581045	0.664664
Signaling by SCF-KIT	17280	REACTOME	2	112	0.581045	0.664664
Toxoplasmosis	10393	KEGG	2	113	0.585908	0.667763
Adaptive Immune System	19062	REACTOME	8	484	0.605083	0.68709
Calcium signaling pathway	667	KEGG	3	181	0.610513	0.690726
Amoebiasis	10368	KEGG	2	119	0.614216	0.692388
Metabolism of amino acids and derivatives	18120	REACTOME	3	183	0.617982	0.694111
Signaling by Hedgehog	19238	REACTOME	2	122	0.627809	0.702602
Cell cycle	717	KEGG	2	123	0.632258	0.705035
Mitotic G1-G1/S phases	18886	REACTOME	2	124	0.636665	0.707405
Osteoclast differentiation	10372	KEGG	2	126	0.645356	0.714501
Axon guidance	612	KEGG	2	130	0.662248	0.730594
EPO signaling pathway	16152	INOH	2	132	0.670451	0.734416
IL-7 signaling	16107	INOH	2	132	0.670451	0.734416
Cytokine-cytokine receptor interaction	604	KEGG	4	264	0.67546	0.737298
JAK STAT pathway and regulation	16126	INOH	3	204	0.690528	0.740705
VEGF signaling pathway	16191	INOH	2	135	0.682454	0.742318
Class I MHC mediated antigen processing & presentation	16844	REACTOME	3	203	0.687319	0.742401
Ion channel transport	18602	REACTOME	2	137	0.690258	0.742986
Ubiquitin mediated proteolysis	632	KEGG	2	136	0.686376	0.743974
Downstream signaling events of B Cell Receptor (BCR)	19848	REACTOME	2	144	0.716342	0.765745
Biological oxidations	19257	REACTOME	2	146	0.723451	0.768047
Fc epsilon receptor (FCERI) signaling	18703	REACTOME	2	146	0.723451	0.768047
Apoptosis	16750	REACTOME	2	147	0.726949	0.769127
Glycogen storage diseases	18944	REACTOME	3	228	0.760297	0.796257
Metabolism of carbohydrates	19819	REACTOME	3	228	0.760297	0.796257
Myoclonic epilepsy of Lafora	19721	REACTOME	3	228	0.760297	0.796257
Transmission across Chemical Synapses	19547	REACTOME	2	159	0.76609	0.799622
Immune System	17702	REACTOME	13	884	0.772401	0.803504
Membrane Trafficking	17132	REACTOME	2	173	0.80555	0.82416
Alzheimer's disease	675	KEGG	2	172	0.802939	0.824209
Innate Immune System	16733	REACTOME	6	450	0.798245	0.824854
Metabolism of lipids and lipoproteins	17812	REACTOME	7	519	0.802307	0.826297
NGF signalling via TRKA from the plasma membrane	19284	REACTOME	2	170	0.797624	0.826968
Cytokine Signaling in Immune system	17370	REACTOME	2	194	0.85373	0.87058
SLC-mediated transmembrane transport	17032	REACTOME	2	223	0.90254	0.917336
Metabolism	17674	REACTOME	19	1414	0.91184	0.923759
Metabolism of proteins	17734	REACTOME	6	555	0.92496	0.933998
MAPK signaling pathway	728	KEGG	2	253	0.936803	0.939834
Signalling by NGF	19028	REACTOME	2	251	0.934927	0.940998
Olfactory transduction	624	KEGG	11	1053	0.980129	0.980129

## Sheet: MAT_BFMI_SNP
Pathway Name	Pathway Id	Source Name	in TRD	in Pathway	Pathway p-value	Pathway p-value (corrected)
Extracellular matrix organization	17713	REACTOME	2	216	0.0116558	0.0466232
Metabolism	17674	REACTOME	3	1414	0.0879042	0.175808
Disease	16877	REACTOME	2	879	0.149864	0.199819
Olfactory transduction	624	KEGG	2	1053	0.200928	0.200928

## Sheet: PAT_B6N
Pathway Name	Pathway Id	Source Name	in TRD	in Pathway	Pathway p-value	Pathway p-value (corrected)
Regulation of lipid metabolism by Peroxisome proliferator-activated receptor alpha (PPARalpha)	17948	REACTOME	6	105	0.00333997	0.105925
Interferon Signaling	18616	REACTOME	5	72	0.00317487	0.11747
PPARA activates gene expression	19083	REACTOME	6	102	0.0028901	0.128321
PPAR signaling pathway	696	KEGG	5	82	0.0055484	0.136861
Beta-oxidation of pristanoyl-CoA	18969	REACTOME	2	8	0.00507432	0.140812
Generic Transcription Pathway	19372	REACTOME	6	120	0.00641013	0.142305
Ubiquitin mediated proteolysis	632	KEGG	6	136	0.0115387	0.14231
ATF6-alpha activates chaperone genes	16795	REACTOME	2	10	0.00800825	0.148153
Synthesis of PIPs at the plasma membrane	16862	REACTOME	3	29	0.00734452	0.148226
ATF6-alpha activates chaperones	18238	REACTOME	2	12	0.0115343	0.150625
Reversible hydration of carbon dioxide	18815	REACTOME	2	12	0.0115343	0.150625
alpha-linolenic (omega3) and linoleic (omega6) acid metabolism	18916	REACTOME	2	12	0.0115343	0.150625
alpha-linolenic acid (ALA) metabolism	18448	REACTOME	2	12	0.0115343	0.150625
Linoleic acid (LA) metabolism	18685	REACTOME	2	6	0.00276837	0.153644
p53 signaling pathway	666	KEGG	4	68	0.0145801	0.170357
Inositol phosphate metabolism	779	KEGG	4	61	0.0100592	0.171781
Peroxisome	8124	KEGG	4	81	0.0259839	0.180264
Phosphatidylinositol signaling system	721	KEGG	4	81	0.0259839	0.180264
Fatty acid, triacylglycerol, and ketone body metabolism	16965	REACTOME	6	165	0.0272193	0.183111
Cell cycle	717	KEGG	5	123	0.0281284	0.183662
Pyruvate metabolism	735	KEGG	3	39	0.0166173	0.184453
Antiviral mechanism by IFN-stimulated genes	17667	REACTOME	3	20	0.00250913	0.185676
ISG15 antiviral mechanism	17669	REACTOME	3	20	0.00250913	0.185676
Bile secretion	10387	KEGG	4	72	0.0176592	0.186682
Basal transcription factors	625	KEGG	3	44	0.02291	0.188371
PI Metabolism	17340	REACTOME	3	44	0.02291	0.188371
ABC transporters	797	KEGG	3	46	0.0257417	0.190488
Nuclear Receptor transcription pathway	16958	REACTOME	3	46	0.0257417	0.190488
Insulin processing	19674	REACTOME	2	20	0.0308934	0.190509
Small cell lung cancer	747	KEGG	4	85	0.0303265	0.192356
Regulation of cholesterol biosynthesis by SREBP (SREBF)	17083	REACTOME	3	45	0.0243034	0.192691
Dual incision reaction in GG-NER	17174	REACTOME	2	17	0.0227179	0.201735
Formation of incision complex in GG-NER	17624	REACTOME	2	17	0.0227179	0.201735
Nitrogen metabolism	691	KEGG	2	17	0.0227179	0.201735
SMAD2/SMAD3:SMAD4 heterotrimer regulates transcription	19878	REACTOME	2	21	0.0338403	0.203042
Peroxisomal lipid metabolism	18981	REACTOME	2	22	0.0368921	0.215528
Nucleotide excision repair	2795	KEGG	3	43	0.0215617	0.217577
Glycerolipid metabolism	772	KEGG	3	55	0.0406919	0.22584
Pyruvate metabolism	18432	REACTOME	2	23	0.0400455	0.227951
CREB phosphorylation through the activation of Ras	17686	REACTOME	2	24	0.0432971	0.228856
Non-small cell lung cancer	787	KEGG	3	56	0.0425727	0.230515
Biosynthesis of unsaturated fatty acids	618	KEGG	2	25	0.0466435	0.235338
alpha-Linolenic acid metabolism	742	KEGG	2	25	0.0466435	0.235338
Metabolism	17674	REACTOME	27	1414	0.0486789	0.240149
ABC-family proteins mediated transport	19283	REACTOME	2	26	0.0500816	0.241698
Propanoate metabolism	732	KEGG	2	27	0.0536082	0.247938
Cytokine Signaling in Immune system	17370	REACTOME	6	194	0.0530031	0.250355
Transcriptional regulation of white adipocyte differentiation	16682	REACTOME	3	65	0.0613987	0.267265
Global Genomic NER (GG-NER)	17378	REACTOME	2	29	0.0609148	0.270462
Post NMDA receptor activation events	17774	REACTOME	2	29	0.0609148	0.270462
Transcriptional activity of SMAD2/SMAD3:SMAD4 heterotrimer	19539	REACTOME	2	31	0.0685394	0.29261
Activation of NMDA receptor upon glutamate binding and postsynaptic events	19633	REACTOME	2	32	0.0724638	0.303528
Cell Cycle Checkpoints	17750	REACTOME	4	115	0.0758502	0.311829
Cyclin D associated events in G1	17883	REACTOME	2	34	0.080523	0.313616
G1 Phase	16871	REACTOME	2	34	0.080523	0.313616
Phospholipid metabolism	19213	REACTOME	4	120	0.0856111	0.316761
Activation of gene expression by SREBF (SREBP)	17082	REACTOME	2	35	0.0846524	0.318523
Recycling pathway of L1	17026	REACTOME	2	35	0.0846524	0.318523
Protein processing in endoplasmic reticulum	10391	KEGG	5	165	0.0795596	0.321131
Binding and Uptake of Ligands by Scavenger Receptors	17757	REACTOME	2	36	0.0888451	0.323338
Mitotic G1-G1/S phases	18886	REACTOME	4	124	0.0938405	0.33601
Interferon gamma signaling	18614	REACTOME	2	43	0.119757	0.35448
RNF mutants show enhanced WNT signaling and proliferation	18167	REACTOME	5	187	0.118716	0.356148
TCF dependent signaling in response to WNT	18550	REACTOME	5	187	0.118716	0.356148
XAV939 inhibits tankyrase, stabilizing AXIN	19889	REACTOME	5	187	0.118716	0.356148
misspliced LRP5 mutants have enhanced beta-catenin-dependent signaling	18155	REACTOME	5	187	0.118716	0.356148
DAP12 interactions	19893	REACTOME	4	138	0.125415	0.361587
Fat digestion and absorption	10400	KEGG	2	40	0.106197	0.362705
G2/M Checkpoints	18178	REACTOME	2	40	0.106197	0.362705
Mitochondrial protein import	17845	REACTOME	2	44	0.124369	0.363287
Gene Expression	19038	REACTOME	14	723	0.127727	0.36353
Senescence-Associated Secretory Phenotype (SASP)	18860	REACTOME	3	83	0.108381	0.364554
Circadian Clock	14815	REACTOME	2	42	0.11519	0.365316
Nucleotide Excision Repair	17730	REACTOME	2	42	0.11519	0.365316
Pyruvate metabolism and Citric Acid (TCA) cycle	18874	REACTOME	2	42	0.11519	0.365316
Immune System	17702	REACTOME	17	884	0.103933	0.366241
Aquaporin-mediated transport	17852	REACTOME	2	46	0.133717	0.375763
Developmental Biology	19101	REACTOME	9	409	0.115094	0.381357
Loss of Function of SMAD2/3 in Cancer	19804	REACTOME	2	57	0.187486	0.39266
Loss of Function of SMAD4 in Cancer	17262	REACTOME	2	57	0.187486	0.39266
Loss of Function of TGFBR1 in Cancer	19120	REACTOME	2	57	0.187486	0.39266
Loss of Function of TGFBR2 in Cancer	18004	REACTOME	2	57	0.187486	0.39266
SMAD2/3 MH2 Domain Mutants in Cancer	18566	REACTOME	2	57	0.187486	0.39266
SMAD2/3 Phosphorylation Motif Mutants in Cancer	16676	REACTOME	2	57	0.187486	0.39266
SMAD4 MH2 Domain Mutants in Cancer	19286	REACTOME	2	57	0.187486	0.39266
Signaling by TGF-beta Receptor Complex	19738	REACTOME	2	57	0.187486	0.39266
Signaling by TGF-beta Receptor Complex in Cancer	17456	REACTOME	2	57	0.187486	0.39266
TGFBR1 KD Mutants in Cancer	19441	REACTOME	2	57	0.187486	0.39266
TGFBR1 LBD Mutants in Cancer	17527	REACTOME	2	57	0.187486	0.39266
TGFBR2 Kinase Domain Mutants in Cancer	18619	REACTOME	2	57	0.187486	0.39266
TGFBR2 MSI Frameshift Mutants in Cancer	19233	REACTOME	2	57	0.187486	0.39266
Amino sugar and nucleotide sugar metabolism	626	KEGG	2	49	0.148024	0.395919
Transcriptional Regulation of Adipocyte Differentiation in 3T3-L1 Pre-adipocytes	14802	REACTOME	2	48	0.14322	0.397435
mRNA surveillance pathway	10362	KEGG	3	95	0.145458	0.398662
Metabolism of proteins	17734	REACTOME	11	555	0.147962	0.400581
Golgi Associated Vesicle Biogenesis	17813	REACTOME	2	50	0.152861	0.403989
Unfolded Protein Response (UPR)	17157	REACTOME	2	59	0.197577	0.409926
Synthesis of substrates in N-glycan biosythesis	17051	REACTOME	2	51	0.157728	0.411949
TCR signaling	19711	REACTOME	2	52	0.162625	0.414974
Signaling by WNT in cancer	17123	REACTOME	5	207	0.160821	0.415144
Jak-STAT signaling pathway	651	KEGG	4	154	0.166197	0.419269
Autodegradation of Cdh1 by Cdh1:APC/C	18310	REACTOME	2	61	0.207734	0.423091
mTOR signaling pathway	743	KEGG	2	61	0.207734	0.423091
Antigen processing: Ubiquitination & Proteasome degradation	18074	REACTOME	4	170	0.211031	0.425899
Membrane Trafficking	17132	REACTOME	4	173	0.219802	0.428035
RNA Polymerase I, RNA Polymerase III, and Mitochondrial Transcription	16787	REACTOME	3	116	0.218197	0.428669
Innate Immune System	16733	REACTOME	9	450	0.173162	0.431931
Biosynthesis of the N-glycan precursor (dolichol lipid-linked oligosaccharide, LLO) and transfer to a nascent protein	17462	REACTOME	2	63	0.217945	0.431998
formation of the beta-catenin:TCF transactivating complex	18061	REACTOME	2	63	0.217945	0.431998
Cell Cycle, Mitotic	16819	REACTOME	8	423	0.234245	0.433354
Disease	16877	REACTOME	15	879	0.237022	0.434867
Glycolysis / Gluconeogenesis	680	KEGG	2	66	0.233341	0.435308
Long-term potentiation	729	KEGG	2	66	0.233341	0.435308
Peptide hormone metabolism	18136	REACTOME	2	66	0.233341	0.435308
Rho GTPase cycle	18718	REACTOME	3	106	0.182545	0.435752
Signaling by Rho GTPases	18142	REACTOME	3	106	0.182545	0.435752
APC/C:Cdc20 mediated degradation of Securin	18457	REACTOME	2	65	0.2282	0.436727
Glioma	740	KEGG	2	65	0.2282	0.436727
Leukocyte transendothelial migration	755	KEGG	3	122	0.240244	0.437165
Signal Transduction	19426	REACTOME	24	1490	0.243759	0.439956
Clathrin derived vesicle budding	19013	REACTOME	2	56	0.182469	0.445144
trans-Golgi Network Vesicle Budding	18801	REACTOME	2	56	0.182469	0.445144
Activation of APC/C and APC/C:Cdc20 mediated degradation of mitotic proteins	17295	REACTOME	2	71	0.25913	0.445944
Melanoma	713	KEGG	2	71	0.25913	0.445944
Osteoclast differentiation	10372	KEGG	3	126	0.255149	0.449547
APC/C:Cdc20 mediated degradation of mitotic proteins	16931	REACTOME	2	70	0.253964	0.45104
APC/C:Cdh1 mediated degradation of Cdc20 and other APC/C:Cdh1 targeted proteins in late mitosis/early G1	18253	REACTOME	2	70	0.253964	0.45104
Toll-Like Receptors Cascades	18742	REACTOME	3	127	0.258896	0.452559
PCP/CE pathway	18163	REACTOME	2	82	0.315842	0.455304
Ribosome	756	KEGG	3	142	0.315773	0.45818
Cellular Senescence	18091	REACTOME	3	141	0.311957	0.458639
Wnt signaling pathway	698	KEGG	3	141	0.311957	0.458639
JAK STAT pathway and regulation	16126	INOH	4	204	0.314879	0.459889
Signaling by Wnt	16953	REACTOME	5	252	0.272597	0.461959
Post-translational protein modification	17765	REACTOME	4	190	0.271142	0.463027
Class I MHC mediated antigen processing & presentation	16844	REACTOME	4	203	0.311728	0.464453
MyD88:Mal cascade initiated on plasma membrane	19563	REACTOME	2	81	0.310711	0.466066
Toll Like Receptor 2 (TLR2) Cascade	16707	REACTOME	2	81	0.310711	0.466066
Toll Like Receptor TLR1:TLR2 Cascade	17466	REACTOME	2	81	0.310711	0.466066
Toll Like Receptor TLR6:TLR2 Cascade	17784	REACTOME	2	81	0.310711	0.466066
Antigen processing and presentation	687	KEGG	2	75	0.279797	0.46703
IL-7 signaling	16107	INOH	3	132	0.277739	0.467106
Regulation of PLK1 Activity at G2/M Transition	18880	REACTOME	2	76	0.284961	0.468602
Wnt signaling pathway	16166	INOH	2	76	0.284961	0.468602
Hematopoietic cell lineage	682	KEGG	2	86	0.336274	0.469515
Regulation of mRNA stability by proteins that bind AU-rich elements	17152	REACTOME	2	86	0.336274	0.469515
DNA Replication Pre-Initiation	19667	REACTOME	2	79	0.300428	0.469682
GAB1 signalosome	19115	REACTOME	2	79	0.300428	0.469682
L1CAM interactions	19011	REACTOME	2	79	0.300428	0.469682
M/G1 Transition	18162	REACTOME	2	79	0.300428	0.469682
APC/C-mediated degradation of cell cycle proteins	17693	REACTOME	2	85	0.331181	0.471296
Regulation of mitotic cell cycle	18373	REACTOME	2	85	0.331181	0.471296
Metabolism of lipids and lipoproteins	17812	REACTOME	16	519	0.00212953	0.472755
Signaling by EGFR	18336	REACTOME	3	147	0.33486	0.473497
Regulation of APC/C activators between G1/S and early anaphase	18229	REACTOME	2	80	0.305573	0.474385
Signaling by FGFR in disease	17267	REACTOME	3	140	0.308143	0.475054
Signaling by EGFR in Cancer	19724	REACTOME	3	149	0.342493	0.47521
Tight junction	607	KEGG	3	137	0.296715	0.477325
RNA degradation	5711	KEGG	2	78	0.295277	0.478477
p75 NTR receptor-mediated signalling	19484	REACTOME	2	78	0.295277	0.478477
Progesterone-mediated oocyte maturation	5709	KEGG	2	89	0.351484	0.481663
Prostate cancer	773	KEGG	2	89	0.351484	0.481663
Mus musculus biological processes	16801	REACTOME	4	218	0.359217	0.48924
RNA Polymerase II Transcription	19676	REACTOME	2	92	0.366575	0.496218
DNA Repair	18035	REACTOME	2	95	0.381533	0.510243
Transmission across Chemical Synapses	19547	REACTOME	3	159	0.38052	0.511972
Cell Cycle	17635	REACTOME	8	501	0.394986	0.525071
Activated TLR4 signalling	19167	REACTOME	2	99	0.401243	0.527076
DNA Replication	17107	REACTOME	2	99	0.401243	0.527076
RNA transport	10354	KEGG	3	166	0.406879	0.531336
Asparagine N-linked glycosylation	19034	REACTOME	2	101	0.410989	0.533565
G1/S Transition	18725	REACTOME	2	103	0.420659	0.542943
G2/M Transition	16797	REACTOME	2	106	0.435011	0.558222
Mitotic G2-G2/M phases	18203	REACTOME	2	108	0.444474	0.560644
Mitotic Prophase	19383	REACTOME	2	108	0.444474	0.560644
beta-catenin independent WNT signaling	17380	REACTOME	2	108	0.444474	0.560644
Toll Like Receptor 4 (TLR4) Cascade	19911	REACTOME	2	109	0.449174	0.56337
Pathways in cancer	4393	KEGG	5	322	0.465079	0.564195
Toxoplasmosis	10393	KEGG	2	113	0.467746	0.564346
Neurotransmitter Receptor Binding And Downstream Transmission In The Postsynaptic Cell	17261	REACTOME	2	112	0.463137	0.564925
Oocyte meiosis	8114	KEGG	2	112	0.463137	0.564925
Signaling by SCF-KIT	17280	REACTOME	2	112	0.463137	0.564925
Purine metabolism	771	KEGG	3	179	0.4549	0.567347
Signalling by NGF	19028	REACTOME	4	251	0.462765	0.573932
Downstream signaling of activated FGFR	17895	REACTOME	2	117	0.485947	0.583136
Cytokine-cytokine receptor interaction	604	KEGG	4	264	0.502134	0.599321
Axon guidance	18680	REACTOME	4	268	0.514004	0.603751
Neurotrophin signaling pathway	4369	KEGG	2	123	0.512521	0.605211
Organelle biogenesis and maintenance	16776	REACTOME	2	123	0.512521	0.605211
M Phase	17726	REACTOME	4	273	0.528662	0.6177
Focal adhesion	788	KEGG	3	207	0.552226	0.631929
DAP12 signaling	19896	REACTOME	2	131	0.546537	0.631933
Signaling by FGFR	19576	REACTOME	2	131	0.546537	0.631933
EPO signaling pathway	16152	INOH	2	132	0.550672	0.633416
VEGF signaling pathway	16191	INOH	2	135	0.562921	0.640864
Cellular responses to stress	17198	REACTOME	3	214	0.574945	0.651213
The citric acid (TCA) cycle and respiratory electron transport	17057	REACTOME	2	139	0.578882	0.652344
Signaling by ERBB4	17279	REACTOME	2	140	0.582805	0.653448
Neuronal System	19094	REACTOME	3	219	0.590734	0.65901
Downstream signaling events of B Cell Receptor (BCR)	19848	REACTOME	2	144	0.598234	0.664039
Endocytosis	4385	KEGG	3	225	0.609184	0.67283
GPCR signaling	16219	INOH	3	243	0.661183	0.726646
Adaptive Immune System	19062	REACTOME	6	484	0.671018	0.733823
Separation of Sister Chromatids	16986	REACTOME	2	167	0.678702	0.738588
Mitotic Metaphase and Anaphase	18597	REACTOME	2	174	0.700463	0.744032
Mitotic Anaphase	19723	REACTOME	2	173	0.69743	0.744372
Alzheimer's disease	675	KEGG	2	172	0.694372	0.744689
Signaling by the B Cell Receptor (BCR)	16805	REACTOME	2	171	0.691289	0.744981
NGF signalling via TRKA from the plasma membrane	19284	REACTOME	2	170	0.68818	0.745249
Gastrin-CREB signalling pathway via PKC and MAPK	17282	REACTOME	2	180	0.718139	0.759176
Platelet activation, signaling and aggregation	17716	REACTOME	2	186	0.734939	0.773253
Signaling by GPCR	17023	REACTOME	7	616	0.76149	0.789957
Chemokine signaling pathway	4351	KEGG	2	195	0.758551	0.790603
Neuroactive ligand-receptor interaction	720	KEGG	3	283	0.758493	0.794271
G alpha (i) signalling events	18914	REACTOME	2	214	0.80253	0.828659
Regulation of actin cytoskeleton	724	KEGG	2	216	0.806724	0.829133
Hemostasis	16941	REACTOME	4	407	0.82369	0.842669
Transmembrane transport of small molecules	18857	REACTOME	5	518	0.854039	0.86971
GPCR downstream signaling	16814	REACTOME	5	524	0.860862	0.872655
MAPK signaling pathway	728	KEGG	2	253	0.871278	0.879198
GPCR ligand binding	18571	REACTOME	3	379	0.902649	0.906733
Olfactory transduction	624	KEGG	2	1053	0.999997	0.999997

## Sheet: PAT_B6N_SNP
Pathway Name	Pathway Id	Source Name	in TRD	in Pathway	Pathway p-value	Pathway p-value (corrected)
Interferon Signaling	18616	REACTOME	2	72	0.00229923	0.0160946
Metabolism	17674	REACTOME	5	1414	0.00766231	0.0178787
Focal adhesion	788	KEGG	2	207	0.0178478	0.0208224
Cytokine Signaling in Immune system	17370	REACTOME	2	194	0.0157804	0.0220925
Cell cycle	717	KEGG	2	123	0.00656843	0.0229895
Metabolism of lipids and lipoproteins	17812	REACTOME	3	519	0.0131846	0.023073
Immune System	17702	REACTOME	2	884	0.227397	0.227397

## Sheet: MAT_B6N
Pathway Name	Pathway Id	Source Name	in TRD	in Pathway	Pathway p-value	Pathway p-value (corrected)
Nitrogen metabolism	691	KEGG	5	17	4.56176e-05	0.0190225
Reversible hydration of carbon dioxide	18815	REACTOME	4	12	0.000161964	0.0337694
Osteoclast differentiation	10372	KEGG	11	126	0.000308321	0.0428567
MyD88:Mal cascade initiated on plasma membrane	19563	REACTOME	7	81	0.00406836	0.080786
Toll Like Receptor 2 (TLR2) Cascade	16707	REACTOME	7	81	0.00406836	0.080786
Toll Like Receptor TLR1:TLR2 Cascade	17466	REACTOME	7	81	0.00406836	0.080786
Toll Like Receptor TLR6:TLR2 Cascade	17784	REACTOME	7	81	0.00406836	0.080786
Toll-Like Receptors Cascades	18742	REACTOME	9	127	0.00453632	0.0859839
MAPK targets/ Nuclear events mediated by MAP kinases	17019	REACTOME	4	28	0.00489279	0.0887085
MyD88 dependent cascade initiated on endosome	18829	REACTOME	7	77	0.00306023	0.091151
Toll Like Receptor 7/8 (TLR7/8) Cascade	19531	REACTOME	7	77	0.00306023	0.091151
MyD88-independent cascade	19392	REACTOME	7	89	0.0068174	0.0917051
TRIF-mediated TLR3/TLR4 signaling	19584	REACTOME	7	89	0.0068174	0.0917051
Toll Like Receptor 3 (TLR3) Cascade	16686	REACTOME	7	89	0.0068174	0.0917051
RSK activation	19707	REACTOME	2	5	0.00594329	0.0917908
Activated TLR4 signalling	19167	REACTOME	8	99	0.00330871	0.091982
Toll Like Receptor 9 (TLR9) Cascade	18230	REACTOME	7	80	0.00379561	0.0931042
ABC transporters	797	KEGG	5	46	0.00560345	0.0934655
Nuclear Receptor transcription pathway	16958	REACTOME	5	46	0.00560345	0.0934655
Signalling to RAS	18104	REACTOME	4	30	0.00629841	0.0938013
Antiviral mechanism by IFN-stimulated genes	17667	REACTOME	4	20	0.00135407	0.0941081
ERK/MAPK targets	17265	REACTOME	4	20	0.00135407	0.0941081
ISG15 antiviral mechanism	17669	REACTOME	4	20	0.00135407	0.0941081
Toll Like Receptor 4 (TLR4) Cascade	19911	REACTOME	8	109	0.00593805	0.0952371
ABC-family proteins mediated transport	19283	REACTOME	4	26	0.0037148	0.0968169
p38MAPK events	18587	REACTOME	3	12	0.00288617	0.100295
Mitochondrial biogenesis	19465	REACTOME	5	39	0.0027111	0.102775
Bile secretion	10387	KEGG	6	72	0.0091192	0.105631
Interferon Signaling	18616	REACTOME	6	72	0.0091192	0.105631
Cytokine Signaling in Immune system	17370	REACTOME	11	194	0.00950554	0.10713
MAPK signaling pathway	728	KEGG	13	253	0.0110625	0.107281
Erythrocytes take up carbon dioxide and release oxygen	18816	REACTOME	2	6	0.00876827	0.10754
Erythrocytes take up oxygen and release carbon dioxide	19344	REACTOME	2	6	0.00876827	0.10754
O2/CO2 exchange in erythrocytes	18817	REACTOME	2	6	0.00876827	0.10754
MyD88 cascade initiated on plasma membrane	17213	REACTOME	6	75	0.0110508	0.109719
Toll Like Receptor 10 (TLR10) Cascade	19899	REACTOME	6	75	0.0110508	0.109719
Toll Like Receptor 5 (TLR5) Cascade	17772	REACTOME	6	75	0.0110508	0.109719
TRAF6 mediated induction of NFkB and MAP kinases upon TLR7/8 or 9 activation	16690	REACTOME	7	75	0.00263427	0.109849
Organelle biogenesis and maintenance	16776	REACTOME	8	123	0.0119724	0.110944
Generic Transcription Pathway	19372	REACTOME	8	120	0.0104066	0.111271
Signalling to ERKs	18746	REACTOME	5	38	0.00241187	0.11175
Amyotrophic lateral sclerosis (ALS)	2811	KEGG	5	53	0.0101904	0.111827
MAP kinase activation in TLR cascade	17697	REACTOME	5	55	0.0118677	0.112474
Insulin processing	19674	REACTOME	3	20	0.0129056	0.116992
Nuclear Events (kinase and transcription factor activation)	19872	REACTOME	4	23	0.00233334	0.121625
NOD-like receptor signaling pathway	8111	KEGG	5	57	0.0137235	0.121759
Ubiquitin mediated proteolysis	632	KEGG	10	136	0.00215426	0.128332
Beta-oxidation of pristanoyl-CoA	18969	REACTOME	2	8	0.0158349	0.137566
VEGF signaling pathway	645	KEGG	5	60	0.0168585	0.143469
Senescence-Associated Secretory Phenotype (SASP)	18860	REACTOME	6	83	0.017586	0.143791
G2/M Checkpoints	18178	REACTOME	4	40	0.0173017	0.144296
Pyruvate metabolism	18432	REACTOME	3	23	0.018978	0.149317
Cellular responses to stress	17198	REACTOME	11	214	0.0186713	0.149729
CDO in myogenesis	18303	REACTOME	3	24	0.0212969	0.150522
CREB phosphorylation through the activation of Ras	17686	REACTOME	3	24	0.0212969	0.150522
Myogenesis	17709	REACTOME	3	24	0.0212969	0.150522
Small cell lung cancer	747	KEGG	6	85	0.019562	0.151062
Pyruvate metabolism and Citric Acid (TCA) cycle	18874	REACTOME	4	42	0.0203885	0.151822
Activation of the AP-1 family of transcription factors	16916	REACTOME	2	9	0.0200263	0.151836
Toxoplasmosis	10393	KEGG	7	113	0.0231851	0.161136
Activation of the pre-replicative complex	18128	REACTOME	3	25	0.0237639	0.162452
Activation of PPARGC1A (PGC-1alpha) by phosphorylation	19864	REACTOME	2	10	0.0246245	0.162991
Unwinding of DNA	17127	REACTOME	2	10	0.0246245	0.162991
Cellular Senescence	18091	REACTOME	8	141	0.0252016	0.164204
DSCAM interactions	18081	REACTOME	2	11	0.0296065	0.181558
ERKs are inactivated	17020	REACTOME	2	11	0.0296065	0.181558
Hormone-sensitive lipase (HSL)-mediated triacylglycerol hydrolysis	16699	REACTOME	2	11	0.0296065	0.181558
Propanoate metabolism	732	KEGG	3	27	0.0291418	0.186956
Post NMDA receptor activation events	17774	REACTOME	3	29	0.0351078	0.209142
Cell cycle	717	KEGG	7	123	0.0346795	0.209585
Transcriptional activation of mitochondrial biogenesis	18723	REACTOME	3	30	0.0383088	0.224997
Golgi Cisternae Pericentriolar Stack Reorganization	18400	REACTOME	2	13	0.0406356	0.235348
Transcriptional activity of SMAD2/SMAD3:SMAD4 heterotrimer	19539	REACTOME	3	31	0.0416535	0.237938
Activation of NMDA receptor upon glutamate binding and postsynaptic events	19633	REACTOME	3	32	0.0451401	0.254371
SEMA3A-Plexin repulsion signaling by inhibiting Integrin adhesion	16647	REACTOME	2	14	0.0466412	0.259325
Activation of ATR in response to replication stress	19222	REACTOME	3	33	0.048767	0.267577
Regulation of pyruvate dehydrogenase (PDH) complex	17336	REACTOME	2	15	0.052948	0.272584
Sema3A PAK dependent Axon repulsion	17510	REACTOME	2	15	0.052948	0.272584
Non-small cell lung cancer	787	KEGG	4	56	0.0511785	0.273608
Signalling by NGF	19028	REACTOME	11	251	0.0507536	0.274861
Peroxisome	8124	KEGG	5	81	0.0521619	0.275335
Recycling pathway of L1	17026	REACTOME	3	35	0.0564333	0.286984
CRMPs in Sema3A signaling	19591	REACTOME	2	16	0.0595373	0.292083
KSRP destabilizes mRNA	17386	REACTOME	2	16	0.0595373	0.292083
Zinc transporters	18577	REACTOME	2	16	0.0595373	0.292083
Growth hormone receptor signaling	19332	REACTOME	3	36	0.0604682	0.293201
Dual incision reaction in GG-NER	17174	REACTOME	2	17	0.066391	0.307612
Formation of incision complex in GG-NER	17624	REACTOME	2	17	0.066391	0.307612
Selenocompound metabolism	780	KEGG	2	17	0.066391	0.307612
Cell Cycle Checkpoints	17750	REACTOME	6	115	0.0686038	0.314371
Oxidative Stress Induced Senescence	16762	REACTOME	5	88	0.0695259	0.315134
Inositol phosphate metabolism	779	KEGG	4	61	0.0661395	0.317014
Oncogene Induced Senescence	17375	REACTOME	2	18	0.073492	0.319231
IL-1 signaling pathway	16111	INOH	3	39	0.0733509	0.321972
formation of the beta-catenin:TCF transactivating complex	18061	REACTOME	4	63	0.0726953	0.322489
Leishmaniasis	10360	KEGG	4	64	0.0760929	0.323783
Progesterone-mediated oocyte maturation	5709	KEGG	5	89	0.0722384	0.323908
Signaling by WNT in cancer	17123	REACTOME	9	207	0.0758732	0.326177
Immune System	17702	REACTOME	29	884	0.0783744	0.326821
Toll-like receptor signaling pathway	16122	INOH	3	40	0.0778954	0.328105
Downregulation of SMAD2/3:SMAD4 transcriptional activity	17936	REACTOME	2	19	0.0808236	0.333698
Long-term potentiation	729	KEGG	4	66	0.0831236	0.339829
Frs2-mediated activation	18359	REACTOME	2	20	0.0883701	0.350955
Glycosaminoglycan biosynthesis	706	KEGG	2	20	0.0883701	0.350955
RNF mutants show enhanced WNT signaling and proliferation	18167	REACTOME	8	187	0.0976217	0.35709
TCF dependent signaling in response to WNT	18550	REACTOME	8	187	0.0976217	0.35709
XAV939 inhibits tankyrase, stabilizing AXIN	19889	REACTOME	8	187	0.0976217	0.35709
misspliced LRP5 mutants have enhanced beta-catenin-dependent signaling	18155	REACTOME	8	187	0.0976217	0.35709
Neurotrophin signaling pathway	4369	KEGG	6	123	0.0882978	0.357477
Mitotic G1-G1/S phases	18886	REACTOME	6	124	0.0909567	0.35782
Nucleotide excision repair	2795	KEGG	3	43	0.0922397	0.359476
Prolonged ERK activation events	19460	REACTOME	2	21	0.0961161	0.364367
SMAD2/SMAD3:SMAD4 heterotrimer regulates transcription	19878	REACTOME	2	21	0.0961161	0.364367
activated TAK1 mediates p38 MAPK activation	18054	REACTOME	2	21	0.0961161	0.364367
Signaling by Wnt	16953	REACTOME	10	252	0.101305	0.36734
Peroxisomal lipid metabolism	18981	REACTOME	2	22	0.104047	0.374031
Toll-like receptor signaling pathway	699	KEGG	5	100	0.105788	0.377041
Chronic myeloid leukemia	777	KEGG	4	73	0.110101	0.385816
Cell Cycle, Mitotic	16819	REACTOME	15	423	0.11002	0.388798
Arrhythmogenic right ventricular cardiomyopathy (ARVC)	4368	KEGG	4	74	0.114241	0.396988
Basigin interactions	17801	REACTOME	2	24	0.120408	0.404921
Histidine metabolism	662	KEGG	2	24	0.120408	0.404921
Metal ion SLC transporters	19686	REACTOME	2	24	0.120408	0.404921
T cell receptor signaling pathway	692	KEGG	5	105	0.123187	0.410951
Chagas disease (American trypanosomiasis)	10401	KEGG	5	104	0.119605	0.412193
Butanoate metabolism	736	KEGG	2	26	0.137348	0.424253
DNA strand elongation	16968	REACTOME	2	26	0.137348	0.424253
Signal Transduction	19426	REACTOME	44	1490	0.131555	0.42526
Gene Expression	19038	REACTOME	23	723	0.138713	0.42532
DNA Replication Pre-Initiation	19667	REACTOME	4	79	0.135934	0.426198
M/G1 Transition	18162	REACTOME	4	79	0.135934	0.426198
RNA degradation	5711	KEGG	4	78	0.131467	0.428296
p75 NTR receptor-mediated signalling	19484	REACTOME	4	78	0.131467	0.428296
Type II diabetes mellitus	641	KEGG	3	50	0.129456	0.428438
Collecting duct acid secretion	10395	KEGG	2	27	0.146004	0.42876
Detoxification of Reactive Oxygen Species	17514	REACTOME	2	27	0.146004	0.42876
Homologous recombination	2797	KEGG	2	27	0.146004	0.42876
Negative regulators of RIG-I/MDA5 signaling	17668	REACTOME	2	27	0.146004	0.42876
NGF signalling via TRKA from the plasma membrane	19284	REACTOME	7	170	0.1347	0.428779
Mitotic Prophase	19383	REACTOME	5	108	0.134226	0.430555
Focal adhesion	788	KEGG	8	207	0.148401	0.432748
Wnt signaling pathway	698	KEGG	6	141	0.142537	0.433854
Loss of Function of SMAD2/3 in Cancer	19804	REACTOME	3	57	0.171007	0.437485
Loss of Function of SMAD4 in Cancer	17262	REACTOME	3	57	0.171007	0.437485
Loss of Function of TGFBR1 in Cancer	19120	REACTOME	3	57	0.171007	0.437485
Loss of Function of TGFBR2 in Cancer	18004	REACTOME	3	57	0.171007	0.437485
SMAD2/3 MH2 Domain Mutants in Cancer	18566	REACTOME	3	57	0.171007	0.437485
SMAD2/3 Phosphorylation Motif Mutants in Cancer	16676	REACTOME	3	57	0.171007	0.437485
SMAD4 MH2 Domain Mutants in Cancer	19286	REACTOME	3	57	0.171007	0.437485
Signaling by TGF-beta Receptor Complex	19738	REACTOME	3	57	0.171007	0.437485
Signaling by TGF-beta Receptor Complex in Cancer	17456	REACTOME	3	57	0.171007	0.437485
TGFBR1 KD Mutants in Cancer	19441	REACTOME	3	57	0.171007	0.437485
TGFBR1 LBD Mutants in Cancer	17527	REACTOME	3	57	0.171007	0.437485
TGFBR2 Kinase Domain Mutants in Cancer	18619	REACTOME	3	57	0.171007	0.437485
TGFBR2 MSI Frameshift Mutants in Cancer	19233	REACTOME	3	57	0.171007	0.437485
Phosphatidylinositol signaling system	721	KEGG	4	81	0.145048	0.438297
Arginine and proline metabolism	695	KEGG	3	58	0.177231	0.44791
RIG-I/MDA5 mediated induction of IFN-alpha/beta pathways	19497	REACTOME	3	58	0.177231	0.44791
NOD1/2 Signaling Pathway	18766	REACTOME	2	28	0.15477	0.448188
ECM-receptor interaction	639	KEGG	4	88	0.178701	0.448907
Dilated cardiomyopathy	5708	KEGG	4	89	0.183711	0.450633
Prostate cancer	773	KEGG	4	89	0.183711	0.450633
Nuclear Pore Complex (NPC) Disassembly	16954	REACTOME	2	31	0.181616	0.450796
Other types of O-glycan biosynthesis	4370	KEGG	2	31	0.181616	0.450796
Apoptosis	759	KEGG	4	84	0.159152	0.451472
Hypertrophic cardiomyopathy (HCM)	4398	KEGG	4	84	0.159152	0.451472
Global Genomic NER (GG-NER)	17378	REACTOME	2	29	0.163634	0.454902
Mucin type O-Glycan biosynthesis	733	KEGG	2	29	0.163634	0.454902
Synthesis of PIPs at the plasma membrane	16862	REACTOME	2	29	0.163634	0.454902
Glycerolipid metabolism	772	KEGG	3	55	0.15876	0.456571
Leukocyte transendothelial migration	755	KEGG	5	122	0.191033	0.460467
Cell Cycle	17635	REACTOME	16	501	0.189495	0.462101
Citrate cycle (TCA cycle)	678	KEGG	2	32	0.190714	0.46237
VEGFA-VEGFR2 Pathway	18662	REACTOME	4	92	0.199011	0.47694
Cyclin D associated events in G1	17883	REACTOME	2	34	0.209081	0.495378
G1 Phase	16871	REACTOME	2	34	0.209081	0.495378
DNA replication	715	KEGG	2	35	0.218332	0.514375
Hemostasis	16941	REACTOME	13	407	0.220741	0.517129
Pancreatic cancer	795	KEGG	3	66	0.228977	0.521768
Peptide hormone metabolism	18136	REACTOME	3	66	0.228977	0.521768
Class I MHC mediated antigen processing & presentation	16844	REACTOME	7	203	0.247002	0.522842
Orc1 removal from chromatin	18150	REACTOME	3	70	0.255837	0.522961
Switching of origins to a post-replicative state	17188	REACTOME	3	70	0.255837	0.522961
p53 signaling pathway	666	KEGG	3	68	0.242345	0.523616
DNA Replication	17107	REACTOME	4	99	0.236079	0.523642
NRAGE signals death through JNK	17436	REACTOME	2	38	0.246265	0.523941
O-linked glycosylation of mucins	17201	REACTOME	2	38	0.246265	0.523941
Hepatitis C	10396	KEGG	5	135	0.250052	0.523979
Bile acid and bile salt metabolism	19596	REACTOME	2	36	0.227618	0.524402
Melanogenesis	694	KEGG	4	100	0.241507	0.524524
Signaling by Interleukins	18761	REACTOME	4	100	0.241507	0.524524
Signaling by VEGF	17216	REACTOME	4	100	0.241507	0.524524
Fc epsilon RI signaling pathway	708	KEGG	3	69	0.249077	0.524571
G1/S Transition	18725	REACTOME	4	103	0.257959	0.524727
Innate Immune System	16733	REACTOME	14	450	0.237887	0.524862
Axon guidance	612	KEGG	5	130	0.226775	0.525361
Antigen processing: Ubiquitination & Proteasome degradation	18074	REACTOME	6	170	0.253667	0.526265
IL-7 signaling	16107	INOH	5	132	0.236009	0.526287
PPARA activates gene expression	19083	REACTOME	4	102	0.252449	0.526357
B cell receptor signaling pathway	790	KEGG	3	72	0.269431	0.527477
Removal of licensing factors from origins	18754	REACTOME	3	72	0.269431	0.527477
Transmembrane transport of small molecules	18857	REACTOME	16	518	0.226427	0.527486
Pyruvate metabolism	735	KEGG	2	39	0.255611	0.527673
Rho GTPase cycle	18718	REACTOME	4	106	0.274628	0.527741
Signaling by Rho GTPases	18142	REACTOME	4	106	0.274628	0.527741
Protein processing in endoplasmic reticulum	10391	KEGG	6	165	0.232884	0.527786
Assembly of the pre-replicative complex	19853	REACTOME	3	67	0.235644	0.528299
RIG-I-like receptor signaling pathway	5715	KEGG	3	67	0.235644	0.528299
M Phase	17726	REACTOME	9	273	0.245852	0.528456
Lipid digestion, mobilization, and transport	18099	REACTOME	2	40	0.264965	0.528662
Nuclear Envelope Breakdown	16745	REACTOME	2	40	0.264965	0.528662
Pyrimidine metabolism	642	KEGG	4	104	0.263494	0.530806
Melanoma	713	KEGG	3	71	0.262622	0.531619
The citric acid (TCA) cycle and respiratory electron transport	17057	REACTOME	5	139	0.269096	0.531816
Glycine, serine and threonine metabolism	688	KEGG	2	41	0.274319	0.532051
Platelet homeostasis	16899	REACTOME	2	41	0.274319	0.532051
Regulation of lipid metabolism by Peroxisome proliferator-activated receptor alpha (PPARalpha)	17948	REACTOME	4	105	0.26905	0.534257
Circadian Clock	14815	REACTOME	2	42	0.283668	0.537679
Nucleotide Excision Repair	17730	REACTOME	2	42	0.283668	0.537679
Ribosome	756	KEGG	5	142	0.283585	0.542453
Pathways in cancer	4393	KEGG	10	322	0.287867	0.543169
Regulation of DNA replication	18076	REACTOME	3	75	0.289966	0.544665
Regulation of PLK1 Activity at G2/M Transition	18880	REACTOME	3	76	0.296839	0.545294
Wnt signaling pathway	16166	INOH	3	76	0.296839	0.545294
Interferon gamma signaling	18614	REACTOME	2	43	0.293006	0.545462
Nucleotide-binding domain, leucine rich repeat containing receptor (NLR) signaling pathways	19142	REACTOME	2	43	0.293006	0.545462
Gastrin-CREB signalling pathway via PKC and MAPK	17282	REACTOME	6	180	0.29663	0.549755
Basal transcription factors	625	KEGG	2	44	0.302328	0.550527
PI Metabolism	17340	REACTOME	2	44	0.302328	0.550527
Aquaporin-mediated transport	17852	REACTOME	2	46	0.320903	0.557569
Deadenylation-dependent mRNA decay	19862	REACTOME	2	46	0.320903	0.557569
G alpha (12/13) signalling events	18452	REACTOME	2	46	0.320903	0.557569
O-linked glycosylation	19927	REACTOME	2	46	0.320903	0.557569
Oocyte meiosis	8114	KEGG	4	112	0.308454	0.55924
Class C/3 (Metabotropic glutamate/pheromone receptors)	16748	REACTOME	2	45	0.311628	0.560125
Mitochondrial translation initiation	18795	REACTOME	3	78	0.310612	0.560714
L1CAM interactions	19011	REACTOME	3	79	0.317507	0.563406
Mitochondrial translation elongation	18701	REACTOME	3	79	0.317507	0.563406
Mitochondrial translation termination	19475	REACTOME	3	79	0.317507	0.563406
Metabolism of lipids and lipoproteins	17812	REACTOME	15	519	0.320428	0.566181
Endocytosis	4385	KEGG	7	225	0.333966	0.577857
PPAR signaling pathway	696	KEGG	3	82	0.3382	0.582765
Metabolism	17674	REACTOME	38	1414	0.343555	0.589557
Cell surface interactions at the vascular wall	17646	REACTOME	3	83	0.345092	0.589768
Deposition of new CENPA-containing nucleosomes at the centromere	19079	REACTOME	2	49	0.348527	0.590796
Nucleosome assembly	19078	REACTOME	2	49	0.348527	0.590796
Mitochondrial translation	16660	REACTOME	3	84	0.351979	0.594232
Phospholipid metabolism	19213	REACTOME	4	120	0.354118	0.595433
Golgi Associated Vesicle Biogenesis	17813	REACTOME	2	50	0.357655	0.596568
Valine, leucine and isoleucine degradation	659	KEGG	2	50	0.357655	0.596568
Transmission across Chemical Synapses	19547	REACTOME	5	159	0.367737	0.596678
Collagen degradation	19760	REACTOME	2	51	0.366737	0.59738
Synthesis of substrates in N-glycan biosythesis	17051	REACTOME	2	51	0.366737	0.59738
Fc gamma R-mediated phagocytosis	4349	KEGG	3	86	0.365726	0.600425
Hematopoietic cell lineage	682	KEGG	3	86	0.365726	0.600425
Regulation of mRNA stability by proteins that bind AU-rich elements	17152	REACTOME	3	86	0.365726	0.600425
Transport of glucose and other sugars, bile salts and organic acids, metal ions and amine compounds	16992	REACTOME	3	86	0.365726	0.600425
TCR signaling	19711	REACTOME	2	52	0.375769	0.607347
Stimuli-sensing channels	16742	REACTOME	3	88	0.379426	0.61089
GnRH signaling pathway	723	KEGG	3	89	0.386253	0.61949
Cell death signalling via NRAGE, NRIF and NADE	18269	REACTOME	2	56	0.411339	0.642428
Clathrin derived vesicle budding	19013	REACTOME	2	56	0.411339	0.642428
trans-Golgi Network Vesicle Budding	18801	REACTOME	2	56	0.411339	0.642428
JAK STAT pathway and regulation	16126	INOH	6	204	0.403822	0.642724
Basal cell carcinoma	663	KEGG	2	55	0.402536	0.643132
Regulatory RNA pathways	19108	REACTOME	3	93	0.413371	0.643193
Acute myeloid leukemia	671	KEGG	2	57	0.420078	0.644017
BMP2 signaling	16230	INOH	2	57	0.420078	0.644017
Loss of Nlp from mitotic centrosomes	17101	REACTOME	2	57	0.420078	0.644017
Loss of proteins required for interphase microtubule organizationÃ?Â from the centrosome	18415	REACTOME	2	57	0.420078	0.644017
GPCR signaling	16219	INOH	7	243	0.408045	0.644526
Synthesis of DNA	16910	REACTOME	3	92	0.406624	0.644723
EPO signaling pathway	16152	INOH	4	132	0.422484	0.645333
DNA Repair	18035	REACTOME	3	95	0.426793	0.647174
mRNA surveillance pathway	10362	KEGG	3	95	0.426793	0.647174
Opioid Signalling	19313	REACTOME	2	58	0.428751	0.647787
Alzheimer's disease	675	KEGG	5	172	0.432563	0.651187
Integrin cell surface interactions	18764	REACTOME	2	59	0.437356	0.653683
Semaphorin interactions	19281	REACTOME	2	59	0.437356	0.653683
VEGF signaling pathway	16191	INOH	4	135	0.439355	0.654325
Developmental Biology	19101	REACTOME	11	409	0.448738	0.665921
Autodegradation of Cdh1 by Cdh1:APC/C	18310	REACTOME	2	61	0.454353	0.669488
mTOR signaling pathway	743	KEGG	2	61	0.454353	0.669488
Purine metabolism	771	KEGG	5	179	0.466965	0.683243
APC/C:Cdc20 mediated degradation of Securin	18457	REACTOME	2	65	0.487445	0.684393
Colorectal cancer	702	KEGG	2	65	0.487445	0.684393
Cytosolic sensors of pathogen-associated DNA	18853	REACTOME	2	65	0.487445	0.684393
ER-Phagosome pathway	17848	REACTOME	2	65	0.487445	0.684393
Glioma	740	KEGG	2	65	0.487445	0.684393
Biosynthesis of the N-glycan precursor (dolichol lipid-linked oligosaccharide, LLO) and transfer to a nascent protein	17462	REACTOME	2	63	0.471053	0.684422
Regulation of insulin secretion	17869	REACTOME	2	63	0.471053	0.684422
Cell-Cell communication	19700	REACTOME	3	102	0.472854	0.684653
SRP-dependent cotranslational protein targeting to membrane	18716	REACTOME	3	101	0.466371	0.684777
Signaling by GPCR	17023	REACTOME	16	616	0.478094	0.685103
Calcium signaling pathway	667	KEGG	5	181	0.476684	0.685439
Peptide ligand-binding receptors	18683	REACTOME	5	181	0.476684	0.685439
Activation of NF-kappaB in B cells	18316	REACTOME	2	66	0.495522	0.686488
Glycolysis / Gluconeogenesis	680	KEGG	2	66	0.495522	0.686488
Renal cell carcinoma	620	KEGG	2	66	0.495522	0.686488
G2/M Transition	16797	REACTOME	3	106	0.498417	0.688211
Resolution of Sister Chromatid Cohesion	17085	REACTOME	3	105	0.492083	0.688586
Platelet activation, signaling and aggregation	17716	REACTOME	5	186	0.500722	0.689112
Signaling by EGFR	18336	REACTOME	4	147	0.505186	0.692969
Signaling by Insulin receptor	17037	REACTOME	3	104	0.485711	0.693635
Mitotic G2-G2/M phases	18203	REACTOME	3	108	0.510964	0.696314
beta-catenin independent WNT signaling	17380	REACTOME	3	108	0.510964	0.696314
Factors involved in megakaryocyte development and platelet production	18141	REACTOME	3	109	0.517176	0.700203
Signaling by EGFR in Cancer	19724	REACTOME	4	149	0.515838	0.700667
APC/C:Cdc20 mediated degradation of mitotic proteins	16931	REACTOME	2	70	0.527012	0.708917
APC/C:Cdh1 mediated degradation of Cdc20 and other APC/C:Cdh1 targeted proteins in late mitosis/early G1	18253	REACTOME	2	70	0.527012	0.708917
Chemokine signaling pathway	4351	KEGG	5	195	0.542872	0.709647
Adipocytokine signaling pathway	758	KEGG	2	72	0.542254	0.711069
Centrosome maturation	19823	REACTOME	2	72	0.542254	0.711069
Recruitment of mitotic centrosome proteins and complexes	16730	REACTOME	2	72	0.542254	0.711069
Disease	16877	REACTOME	22	879	0.535692	0.711413
Mitotic Prometaphase	18604	REACTOME	3	112	0.535556	0.713504
Neurotransmitter Receptor Binding And Downstream Transmission In The Postsynaptic Cell	17261	REACTOME	3	112	0.535556	0.713504
Metabolism of nucleotides	19782	REACTOME	2	73	0.549747	0.714158
Viral myocarditis	8115	KEGG	2	73	0.549747	0.714158
G alpha (q) signalling events	19293	REACTOME	4	156	0.552257	0.71519
Activation of APC/C and APC/C:Cdc20 mediated degradation of mitotic proteins	17295	REACTOME	2	71	0.534676	0.716913
Gastric acid secretion	10371	KEGG	2	74	0.557154	0.717078
IRS-mediated signalling	19299	REACTOME	2	74	0.557154	0.717078
Jak-STAT signaling pathway	651	KEGG	4	154	0.541995	0.717499
RNA Polymerase I, RNA Polymerase III, and Mitochondrial Transcription	16787	REACTOME	3	116	0.559438	0.717801
S Phase	19854	REACTOME	3	117	0.565292	0.723089
Adherens junction	741	KEGG	2	76	0.571708	0.726835
Antigen processing-Cross presentation	18791	REACTOME	2	76	0.571708	0.726835
Glycerophospholipid biosynthesis	19211	REACTOME	2	77	0.578854	0.733684
IRS-related events	19250	REACTOME	2	78	0.585913	0.738144
IRS-related events triggered by IGF1R	18469	REACTOME	2	78	0.585913	0.738144
Membrane Trafficking	17132	REACTOME	4	173	0.634263	0.738792
Mitotic Anaphase	19723	REACTOME	4	173	0.634263	0.738792
Chromosome Maintenance	16909	REACTOME	2	82	0.613274	0.73912
Insulin receptor signalling cascade	18398	REACTOME	2	82	0.613274	0.73912
PCP/CE pathway	18163	REACTOME	2	82	0.613274	0.73912
Transcriptional regulation by small RNAs	18461	REACTOME	2	82	0.613274	0.73912
IGF1R signaling cascade	18472	REACTOME	2	81	0.606565	0.739584
Integrin signaling pathway	16139	INOH	2	81	0.606565	0.739584
Signaling by Type 1 Insulin-like Growth Factor 1 Receptor (IGF1R)	18473	REACTOME	2	81	0.606565	0.739584
TGF-beta signaling pathway	633	KEGG	2	81	0.606565	0.739584
Mitotic Metaphase and Anaphase	18597	REACTOME	4	174	0.638776	0.741976
Regulation of actin cytoskeleton	724	KEGG	5	216	0.634106	0.742759
APC/C-mediated degradation of cell cycle proteins	17693	REACTOME	2	85	0.632878	0.743409
Nonsense Mediated Decay (NMD) independent of the Exon Junction Complex (EJC)	17898	REACTOME	2	85	0.632878	0.743409
Orphan transporters	17390	REACTOME	2	85	0.632878	0.743409
RNA Polymerase I Transcription	16736	REACTOME	2	85	0.632878	0.743409
Regulation of mitotic cell cycle	18373	REACTOME	2	85	0.632878	0.743409
Steroid hormone biosynthesis	786	KEGG	2	85	0.632878	0.743409
Eukaryotic Translation Termination	17591	REACTOME	2	80	0.599769	0.744356
Peptide chain elongation	16999	REACTOME	2	80	0.599769	0.744356
Regulation of APC/C activators between G1/S and early anaphase	18229	REACTOME	2	80	0.599769	0.744356
RNA transport	10354	KEGG	4	166	0.601677	0.744508
Cardiac muscle contraction	4354	KEGG	2	79	0.592884	0.744677
Eukaryotic Translation Elongation	18743	REACTOME	2	83	0.619896	0.744947
Neuronal System	19094	REACTOME	5	219	0.646204	0.746446
Fatty acid, triacylglycerol, and ketone body metabolism	16965	REACTOME	4	165	0.596883	0.747448
ErbB signaling pathway	627	KEGG	2	87	0.645513	0.747719
Separation of Sister Chromatids	16986	REACTOME	4	167	0.606437	0.748178
Vascular smooth muscle contraction	4355	KEGG	3	128	0.626479	0.748544
RNA Polymerase I Promoter Clearance	19627	REACTOME	2	84	0.626431	0.750637
Integration of energy metabolism	17060	REACTOME	2	89	0.657803	0.755659
Protein digestion and absorption	10377	KEGG	2	89	0.657803	0.755659
Ion channel transport	18602	REACTOME	3	137	0.671981	0.761457
Tight junction	607	KEGG	3	137	0.671981	0.761457
Formation of a pool of free 40S subunits	18890	REACTOME	2	91	0.669752	0.763078
Metabolism of amino acids and derivatives	18120	REACTOME	4	183	0.677756	0.763849
GPCR downstream signaling	16814	REACTOME	12	524	0.668803	0.764085
Translation	17506	REACTOME	3	138	0.676779	0.764815
Axon guidance	18680	REACTOME	6	268	0.667907	0.765157
TGF-beta signaling	16256	INOH	2	94	0.687042	0.772228
Insulin signaling pathway	664	KEGG	3	142	0.695454	0.779581
Degradation of the extracellular matrix	19757	REACTOME	2	100	0.719399	0.787374
Nonsense Mediated Decay (NMD) enhanced by the Exon Junction Complex (EJC)	17890	REACTOME	2	99	0.714208	0.787896
Nonsense-Mediated Decay (NMD)	17718	REACTOME	2	99	0.714208	0.787896
Neuroactive ligand-receptor interaction	720	KEGG	6	283	0.718122	0.788044
Asparagine N-linked glycosylation	19034	REACTOME	2	101	0.724511	0.788828
L13a-mediated translational silencing of Ceruloplasmin expression	19353	REACTOME	2	101	0.724511	0.788828
Post-translational protein modification	17765	REACTOME	4	190	0.706001	0.789283
Apoptosis	16750	REACTOME	3	147	0.717643	0.789596
Parkinson's disease	2792	KEGG	3	145	0.70892	0.790427
Biological oxidations	19257	REACTOME	3	146	0.713307	0.791088
Fc epsilon receptor (FCERI) signaling	18703	REACTOME	3	146	0.713307	0.791088
GTP hydrolysis and joining of the 60S ribosomal subunit	19753	REACTOME	2	102	0.729544	0.792239
GPCR ligand binding	18571	REACTOME	8	379	0.73975	0.801236
Pancreatic secretion	10399	KEGG	2	105	0.744179	0.803945
Cap-dependent Translation Initiation	18051	REACTOME	2	108	0.758134	0.812704
Epigenetic regulation of gene expression	18436	REACTOME	2	108	0.758134	0.812704
Eukaryotic Translation Initiation	18327	REACTOME	2	108	0.758134	0.812704
Signaling by SCF-KIT	17280	REACTOME	2	112	0.775717	0.829421
Adaptive Immune System	19062	REACTOME	10	484	0.779167	0.830979
Natural killer cell mediated cytotoxicity	716	KEGG	2	114	0.784085	0.83409
G alpha (i) signalling events	18914	REACTOME	4	214	0.78913	0.835196
Phagosome	10382	KEGG	3	165	0.787248	0.835324
Extracellular matrix organization	17713	REACTOME	4	216	0.795129	0.839414
Mus musculus biological processes	16801	REACTOME	4	218	0.80099	0.843467
Amoebiasis	10368	KEGG	2	119	0.803818	0.844313
SLC-mediated transmembrane transport	17032	REACTOME	4	223	0.815054	0.853964
Metabolism of proteins	17734	REACTOME	11	555	0.829791	0.8629
HATs acetylate histones	17355	REACTOME	2	127	0.832081	0.863129
Class A/1 (Rhodopsin-like receptors)	17050	REACTOME	5	277	0.82923	0.864473
Downstream signal transduction	17892	REACTOME	2	126	0.82876	0.866147
Spliceosome	8119	KEGG	2	134	0.853753	0.883412
Chromatin modifying enzymes	18029	REACTOME	3	195	0.871476	0.8907
Chromatin organization	16838	REACTOME	3	195	0.871476	0.8907
Signaling by ERBB4	17279	REACTOME	2	140	0.870274	0.893853
Signaling by FGFR in disease	17267	REACTOME	2	140	0.870274	0.893853
Systemic lupus erythematosus	2813	KEGG	2	139	0.867645	0.895564
Downstream signaling events of B Cell Receptor (BCR)	19848	REACTOME	2	144	0.88032	0.897539
Signaling by PDGF	19066	REACTOME	2	145	0.882717	0.897788
Cytokine-cytokine receptor interaction	604	KEGG	4	264	0.90216	0.91533
Signaling by the B Cell Receptor (BCR)	16805	REACTOME	2	171	0.931423	0.942727
Huntington's disease	4374	KEGG	2	193	0.957048	0.966317
Glycogen storage diseases	18944	REACTOME	2	228	0.98002	0.982376
Metabolism of carbohydrates	19819	REACTOME	2	228	0.98002	0.982376
Myoclonic epilepsy of Lafora	19721	REACTOME	2	228	0.98002	0.982376
Olfactory transduction	624	KEGG	3	1053	1	1

## Sheet: MAT_B6N_SNP
Pathway Name	Pathway Id	Source Name	in TRD	in Pathway	Pathway p-value	Pathway p-value (corrected)
Cell death signalling via NRAGE, NRIF and NADE	18269	REACTOME	2	56	0.00572331	0.0438787
G alpha (12/13) signalling events	18452	REACTOME	2	46	0.0038934	0.0447741
Rho GTPase cycle	18718	REACTOME	2	106	0.0194689	0.0497537
Signaling by Rho GTPases	18142	REACTOME	2	106	0.0194689	0.0497537
p75 NTR receptor-mediated signalling	19484	REACTOME	2	78	0.0108672	0.0499893
Interferon Signaling	18616	REACTOME	2	72	0.00931701	0.0535728
Metabolism	17674	REACTOME	7	1414	0.0171288	0.0562804
Cell cycle	717	KEGG	2	123	0.0257162	0.0591473
DNA Repair	18035	REACTOME	2	95	0.0158294	0.0606793
NRAGE signals death through JNK	17436	REACTOME	2	38	0.00267028	0.0614163
Metabolism of amino acids and derivatives	18120	REACTOME	2	183	0.0531052	0.101785
Cytokine Signaling in Immune system	17370	REACTOME	2	194	0.0589178	0.104239
Focal adhesion	788	KEGG	2	207	0.0660639	0.108534
Calcium signaling pathway	667	KEGG	2	181	0.0520724	0.108879
MAPK signaling pathway	728	KEGG	2	253	0.0934943	0.119465
Immune System	17702	REACTOME	4	884	0.0998473	0.120868
Signalling by NGF	19028	REACTOME	2	251	0.0922387	0.124794
GPCR downstream signaling	16814	REACTOME	3	524	0.088442	0.127135
Metabolism of lipids and lipoproteins	17812	REACTOME	3	519	0.08648	0.132603
Signaling by GPCR	17023	REACTOME	3	616	0.127883	0.147066
Innate Immune System	16733	REACTOME	2	450	0.234801	0.257163
Transmembrane transport of small molecules	18857	REACTOME	2	518	0.287525	0.300595
Signal Transduction	19426	REACTOME	4	1490	0.365374	0.365374
